# Supplementary material
Source: PubMed Central journal article supplement (PMC3673022)
Supplement: NIHMS469094-supplement-SuppData.pdf [file NIHMS469094-supplement-SuppData.pdf]

## Supplementary Information for

### **Exome sequencing identifies recurrent SPOP, FOXA1 and MED12 mutations in prostate cancer.**

Christopher E. Barbieri, Sylvan C. Baca, Michael S. Lawrence, Francesca Demichelis, Mirjam Blattner, Jean-Philippe Theurillat, Thomas A. White, Petar Stojanov, Eliezer Van Allen, Nicolas Stransky, Elizabeth Nickerson, Sung-Suk Chae, Gunther Boysen, Daniel Auclair, Robert Onofrio, Kyung Park, Naoki Kitabayashi, Theresa Y. MacDonald, Karen Sheikh, Terry Vuong, Candace Guiducci, Kristian Cibulskis, Andrey Sivachenko, Scott L. Carter, Gordon Saksena, Douglas Voet, Wasay M. Hussain, Alex H. Ramos, Wendy Winckler, Michelle C. Redman, Kristin Ardlie, Ashutosh K. Tewari, Juan Miguel Mosquera, Niels Rupp, Peter J. Wild, Holger Moch, Colm Morrissey, Peter S. Nelson, Philip W. Kantoff, Stacey B. Gabriel, Todd R. Golub, Matthew Meyerson, Eric S. Lander, Gad Getz, Mark A. Rubin\* and Levi A. Garraway\*

\* To whom correspondence should be addressed: [rubinma@med.cornell.edu](mailto:rubinma@med.cornell.edu) (M.A.R.); [levi\\_garraway@dfci.harvard.edu](mailto:levi_garraway@dfci.harvard.edu) (L.A.G.)

#### **This PDF file includes:**

Supplementary Note  
Supplementary Figures 1 through 18  
Supplementary References  
Supplementary Tables 1, 4 through 11

#### **Other Supplementary Information for this manuscript includes the following:**

Supplementary Tables 2, 3, 12 (.xls or .seg files)

## Supplementary Note

### Description of prostate tumor cohorts

Clinically localized primary prostate cancers were selected for exome- and transcriptome-sequencing from two cohorts: Weill Cornell Medical College (WCMC; New York, NY) (Esgueva *et al.*, in press) and Uropath (Perth, Australia), a commercial supplier of banked urological tissues. Participating patients had received no prior treatment for prostate cancer. We selected tumors based on suitability for sequencing, choosing specimens with cancerous foci relatively free from admixed normal tissue that yielded high-quality DNA.

Tumors from the WCMC cohort were collected by the Institutional Biobank from patients undergoing radical prostatectomy by one surgeon (A.K.T.) for clinically localized prostate cancer. Patient-matched normal DNA was obtained from whole blood samples for this cohort.

Tumors from the Uropath cohort were obtained from men undergoing radical prostatectomy for clinically localized prostate cancer across multiple medical centers in Western Australia between 2000 and 2010. Samples from both cohorts were stored at -80°C. Paired normal DNA was sequenced from benign prostate tissue with no histological evidence of neoplasia.

For both cohorts, Hematoxylin and Eosin (H&E)-stained tissue sections were centrally reviewed by J-M. M., K.P. and M.A.R. to verify Gleason score and to determine the percentage of Gleason pattern 4 and 5 histology at the site selected for DNA extraction. To characterize the ethnic composition of the cohorts, we analyzed high-density SNP array data by principal component analysis in combination with data from cohorts of known ethnicity from the HapMap database (CEU, YRI, CHB/JPT; <http://hapmap.ncbi.nlm.nih.gov/>) (Supplementary Fig. 16). All but five individuals chosen for exome sequencing clustered with CEU HapMap samples, indicating that patients were predominantly of European descent. Four samples showed mixed or undetermined ethnicity and one clustered clearly with CHB/JPT (Han Chinese in Beijing/Japanese in Tokyo) HapMap samples.

Prostate tumor cohorts from University of Michigan (UM), University of Washington (UW) and University Hospital Zurich (UZH) were used for extension screening for SPOP mutation. Prostate samples from the UM cohort were obtained from the radical prostatectomy series at the University of Michigan and from the Rapid Autopsy Program<sup>54</sup>, University of Michigan Prostate Cancer Specialized Program of Research Excellence Tissue Core (Ann Arbor, MI). Tumors from the UW cohort were obtained from the Rapid Autopsy Program, University of Washington and Fred Hutchison Cancer Research Center

University (Seattle, WA). Samples from the UHZ cohort included a series of radical prostatectomy specimens, metastases, and benign prostatic hyperplasia samples. H&E–stained slides of all specimens were reevaluated by two experienced pathologists (P.J.W., H.M.) to identify representative areas. Tumor stage and Gleason score of the Zurich cohort were assigned according to the International Union Against Cancer and World Health Organization/International Society of Urological Pathology criteria.

All samples were collected with informed consent of the patients and prior approval of the institutional review boards (IRB) of respective institutions. Additionally, the sequencing and data release of all exome- and transcriptome-sequenced samples was reviewed and approved by local IRB.

### Correlation of mutation rates and pathological features

We investigated whether pathological features corresponded to different mutational spectra. Pathologic stage pT3 tumors contained more mutations than pT2 tumors ( $P = 0.0012$ , rank sum test) despite equivalent tumor purity between these classes (Supplementary Figs. 17, 18). Substitutions in *PTEN* and *PIK3CA* were enriched in pT3 tumors ( $P = 0.011$ , Fisher's exact test) (Supplementary Table 11), suggesting that these mutations may play a role in disease progression. Consistent with this possibility, activation of the PI3-Kinase pathway in mouse models accelerates the progression of prostate cancer<sup>61,62</sup>. This finding will need to be extended to larger panels of tumors due to the relatively small number of *PTEN* and *PIK3CA* mutations reported here. Interestingly, the base mutation rate showed no correlation with Gleason score (a histological measure of disease risk) (Supplementary Fig. 18), indicating that mutational burden does not track uniformly with disease aggressiveness.

### Distinct mutational characteristics of *TMPRSS2-ERG* fusion-positive tumors

We determined whether the mutational spectrum varied between prostate tumors harboring the *TMPRSS2-ERG* fusion and fusion-negative tumors. *TMPRSS2-ERG* fusion-positive tumors showed an increased proportion of CpG to T transitions ( $P = 0.0002$ , Supplementary Fig. 18) but did not harbor more mutations overall. Since CpG to T transitions can arise from deamination of methylcytosine in cancer, this trend may reflect the differential methylation of DNA between ETS fusion-positive and fusion-negative tumors that was recently reported<sup>63</sup> or may indicate a distinct mutagenic process in fusion-positive tumors.

Distinct genomic lesions co-occurred with the *TMPRSS2-ERG* fusion. *PTEN* mutation or deletion was significantly associated with *ERG* rearrangement ( $P = 0.00042$ ) (Fig. 4), consistent with reports of collaboration between these two oncogenic events in mouse models<sup>64,65</sup>. Tumors with *ERG* rearrangement were also enriched for p53 lesions ( $P = 0.000025$ ) (Fig. 4). This relationship is consistent with other primary prostate cancer datasets ( $P = 0.0044$ )<sup>12,33</sup>.

### Somatic copy number alteration at the *SPOP* locus

Previous reports indicate that *SPOP* may function as an oncogene based on genomic amplifications in other cancers<sup>17</sup> and protein overexpression in clear cell renal cell carcinomas<sup>29</sup>. However, minimal somatic copy number aberrations are seen in the *SPOP* locus in primary prostate cancers from multiple cohorts, with no evidence of deletions in tumors with *SPOP* mutations (Fig. 1, Supplementary Fig 10)<sup>12</sup>. In addition, *SPOP* mRNA expression was not up-regulated in prostate cancer samples from multiple cohorts, but was more frequently down-regulated compared to benign controls (Supplementary Fig. 11). We therefore conclude that the biological effect of *SPOP* mutations is not recapitulated by somatic copy number alterations in primary prostate cancer.

### Mutual exclusivity of *SPOP* and *ERG* alteration within a single prostate

A single tumor was originally classified as positive for both *SPOP* mutation and *TMPRSS2-ERG* fusion. Interestingly, re-analysis of this case revealed two morphologically distinct tumors: one focus with wild-type *SPOP* and *ERG* rearrangement, and a second with the *SPOP*<sup>F133V</sup> mutation and no *ERG* rearrangement (Supplementary Fig. 13). Therefore, the mutual exclusivity of these events is recapitulated in two tumor foci from a single prostate.

### Low-frequency mutations in cancer-associated genes

Multiple genes with established roles in other cancers were mutated at low frequency, including *IDH1*, *AKT1* and *HRAS* (Supplementary Table 4). An analysis of predicted “damaging” mutations (nonsense substitutions, frame-shift indels and splice site alterations) in genes expressed in prostate tumors identified mutations in *APC*, *PIK3R1* and *EPHA7* (Supplementary Table 4). In addition, several chromatin-modifying enzymes harbored low-frequency damaging mutations, including *MLL1*, *MLL2*, *MLL3*, *ARID1A*, *NCOR1* and the histone demethylase gene *KDM6A* (*UTX*). Two *KDM6A* mutations involved residues situated within the catalytic Jumonji domain (I1209 and G1212), while a third introduced a frame-shift deletion directly N-terminal to this region (Supplementary Table 4). These findings underscore the emerging importance of chromatin-modifying genes in prostate cancer<sup>66</sup>. Notably, *AR* was not mutated in any primary tumor analyzed, consistent with prior studies suggesting that mutations in this gene are restricted to metastatic or castration-resistant disease<sup>7,12</sup>.

## List of Tables and Figures

**Supplementary Figure 1.** Depth and breadth of exome sequencing coverage.

**Supplementary Figure 2.** Overlap of sample profiling across platforms.

**Supplementary Figure 3.** Rates of somatic substitutions in prostate exomes.

**Supplementary Figure 4.** Expression levels of select mutated genes.

**Supplementary Figure 5.** Laser capture microdissection and sequencing of *MED12*.

**Supplementary Figure 6.** Mutations in *SPOP* in RNA-seq data and Sanger sequencing of genomic tumor DNA.

**Supplementary Figure 7.** Multiple Sequence Alignment of the MATH domain of *SPOP* across species.

**Supplementary Figure 8.** Multiple independent siRNAs targeting *SPOP* have similar effects in prostate cell lines.

**Supplementary Figure 9.** Transfection with *SPOP* siRNA or *SPOP* mutant does not affect cell growth or viability.

**Supplementary Figure 10.** Minimal changes in *SPOP* copy number in primary prostate cancer.

**Supplementary Figure 11.** *SPOP* is not upregulated in prostate cancer.

**Supplementary Figure 12.** Tumors with *SPOP* mutation lack *ETS* rearrangements.

**Supplementary Figure 13.** Separate foci of prostate adenocarcinoma with mutually exclusive *ERG*-rearranged and *SPOP*-mutated status.

**Supplementary Figure 14.** Detection of *SPOP* mutation in high-grade prostatic intraepithelial neoplasia (HGPIN).

**Supplementary Figure 15.** Tumors with *SPOP* mutation lack *PTEN* deletion in primary but not metastatic prostate cancer.

**Supplementary Figure 16.** Ethnicity analysis of exome-sequenced DNA.

**Supplementary Figure 17.** Relative ability to detect mutations in subgroups of tumors.

**Supplementary Figure 18.** Mutational landscape across a spectrum of primary prostate cancers.

**Supplementary Table 1.** Clinical Characteristics of Exome-Sequenced Primary Prostate Cancers

**Supplementary Table 2.** Exome Sequencing Statistic Summaries

**Supplementary Table 3.** Somatic Mutations in 112 Primary Prostate Tumor-Normal Pairs

**Supplementary Table 4.** Mutations in Significantly-Mutated Genes and other Selected Genes

**Supplementary Table 5.** Significantly Mutated Gene Sets

**Supplementary Table 6.** Systematic Sequencing Studies Including *SPOP*

**Supplementary Table 7.** *SPOP* Mutations in Multiple Cohorts

**Supplementary Table 8.** Somatic Copy Number Alterations Associated with *SPOP* Mutation

**Supplementary Table 9.** Primer Sequences

**Supplementary Table 10.** BAC Probes Used for FISH

**Supplementary Table 11.** Mutation of *PIK3CA* and *PTEN* is Enriched in Locally Advanced Tumors

**Supplementary Table 12.** Copy Number Alterations in 112 Exome-Sequenced Prostate Tumors (seg file format)

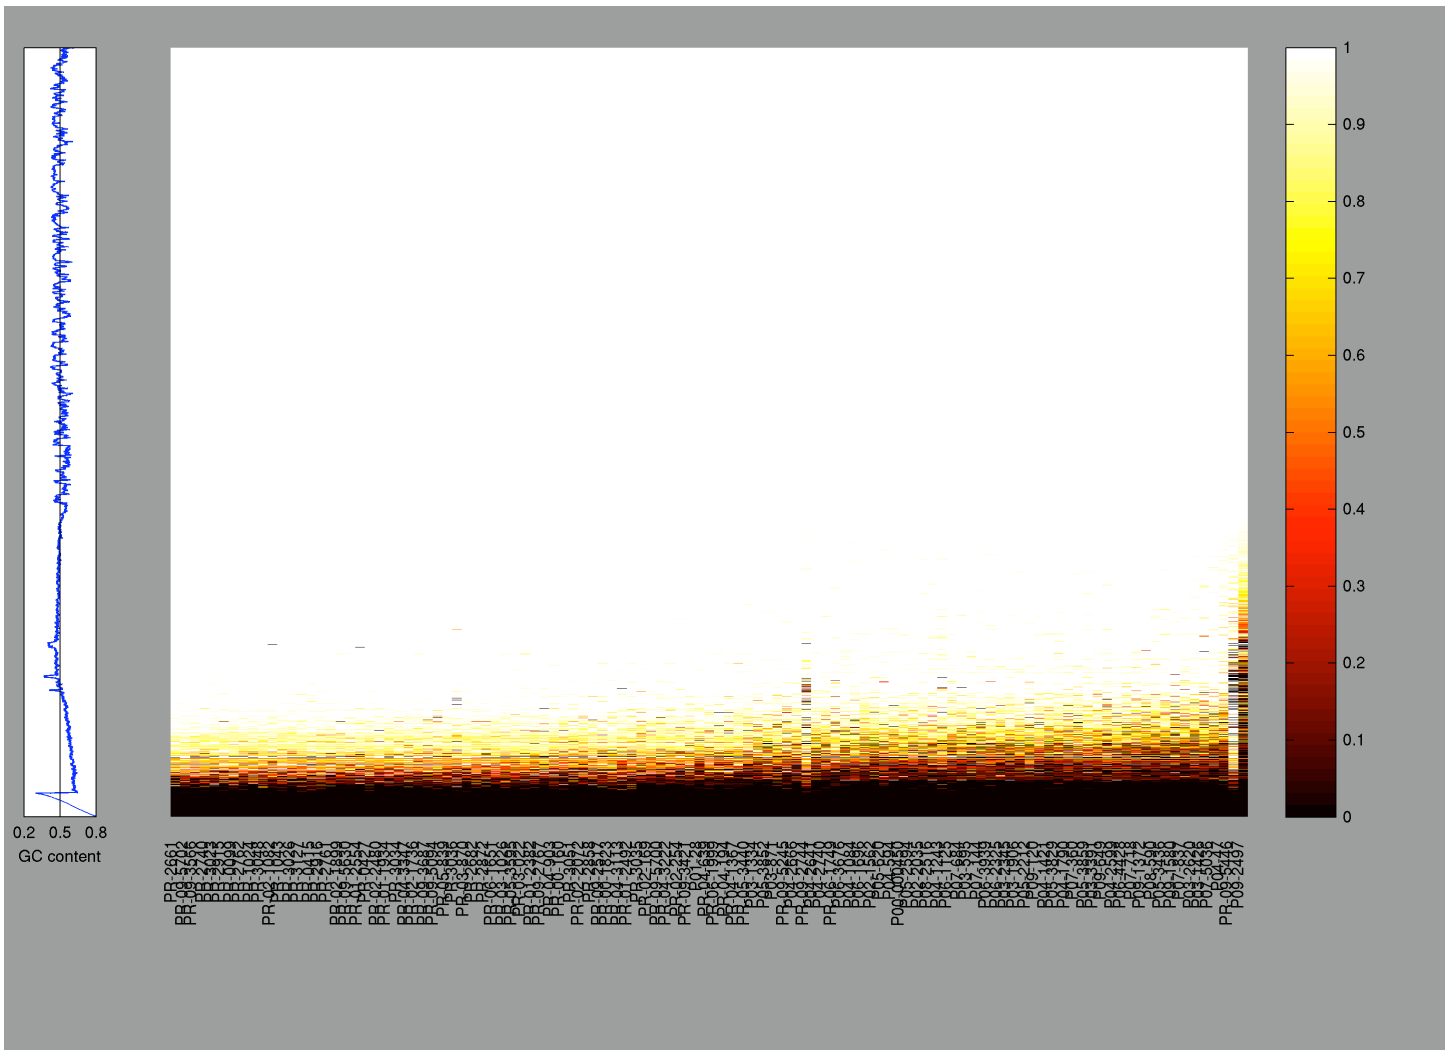

**Supplementary Figure 1. Depth and Breadth of Exome Sequencing Coverage.** (Center) Sequencing coverage across all sites targeted by hybrid capture. Each row represents a targeted exonic site; each column represents a tumor-normal pair. Coloring reflects the depth of sequencing coverage. White coloring indicates a minimum of 14 reads in the tumor and 8 reads in the normal. (Left) GC content across targeted sites (GC content is equal to the number of C or G nucleotides divided by the total number of nucleotides).

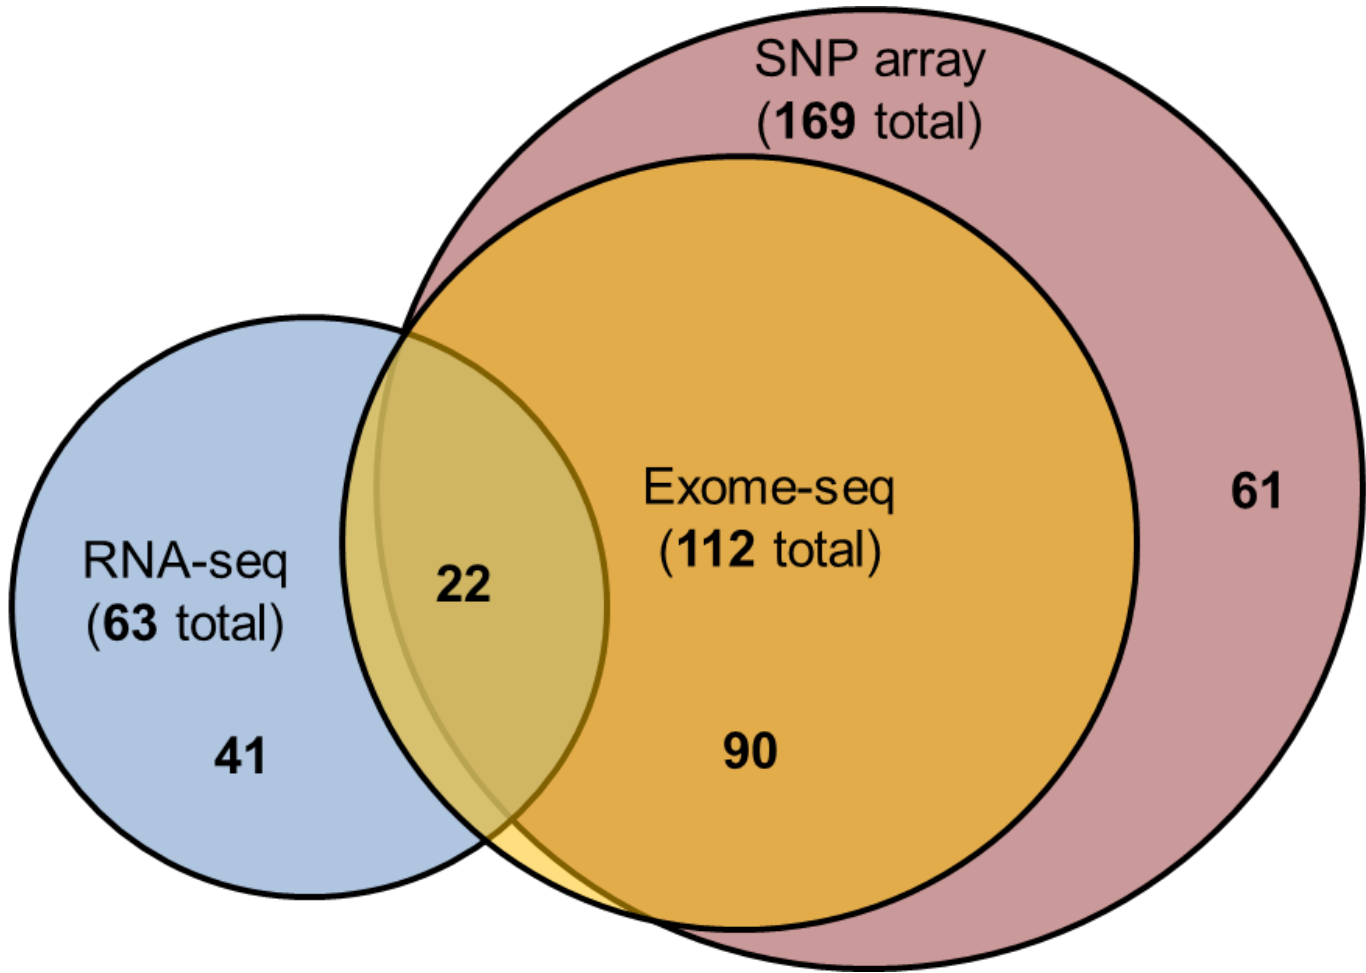

**Supplementary Figure 2. Overlap of sample profiling across platforms.** Exome sequencing was conducted on 112 tumor-normal pairs. A single highly-mutated tumor (PR-00-1165) was excluded from subsequent analyses, except where otherwise indicated, leaving 111 pairs. RNA-sequencing was performed on 22 of the exome-sequenced tumors and 41 independent tumors. All but four of the 112 exome-sequenced tumors, plus an additional 61 tumors, were analyzed for copy number alteration by high-density SNP array (169 total).



**A**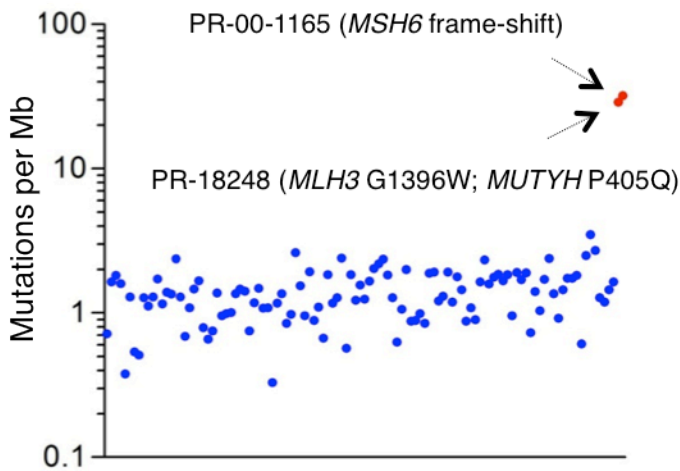**B**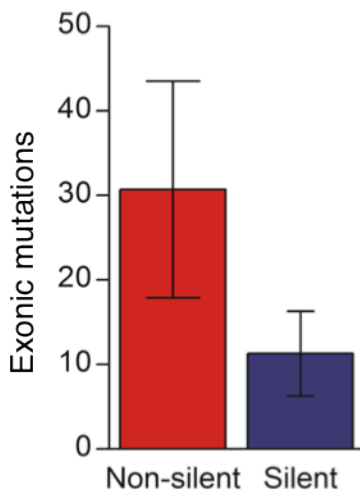**C**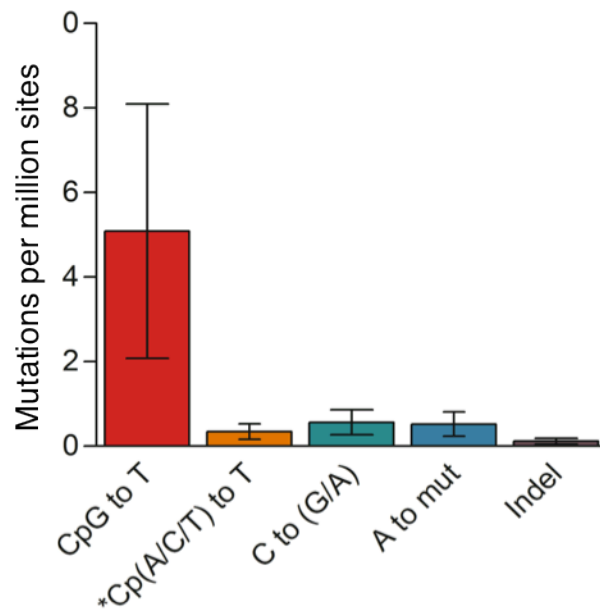

**Supplementary Figure 3. Rates of somatic substitutions in prostate exomes.** (A) Number of somatic mutations per Mb sequenced across the cohort of tumors. A single primary tumor (PR-00-1165) harbored a large excess of mutations compared to other tumors (32.1 per Mb versus 1.4 per Mb median in the remaining primary tumors, red). A prostate cancer metastasis sequenced but not reported here showed a similar extent of mutation (PR-18248; 29.0 mutations per Mb, red). The two highly mutated tumors contained the indicated alterations in DNA mismatch repair genes. (B) Median number of non-synonymous and synonymous mutations across 111 exomes (the single hyper-mutated primary tumor PR-00-1165, with 997 mutations, is excluded). (C) Mutations per million sites sequenced for the most frequent mutation categories in the dataset. \*CpG to T, C to T transversion at a CpG dinucleotide; \*CpG to A/C/T, C to T transversion not in the context of a CpG dinucleotide; C to (G/A), mutation of C to G or A; A to mut, mutation of A; Indel, small insertion or deletion. Error bars indicate standard deviation.

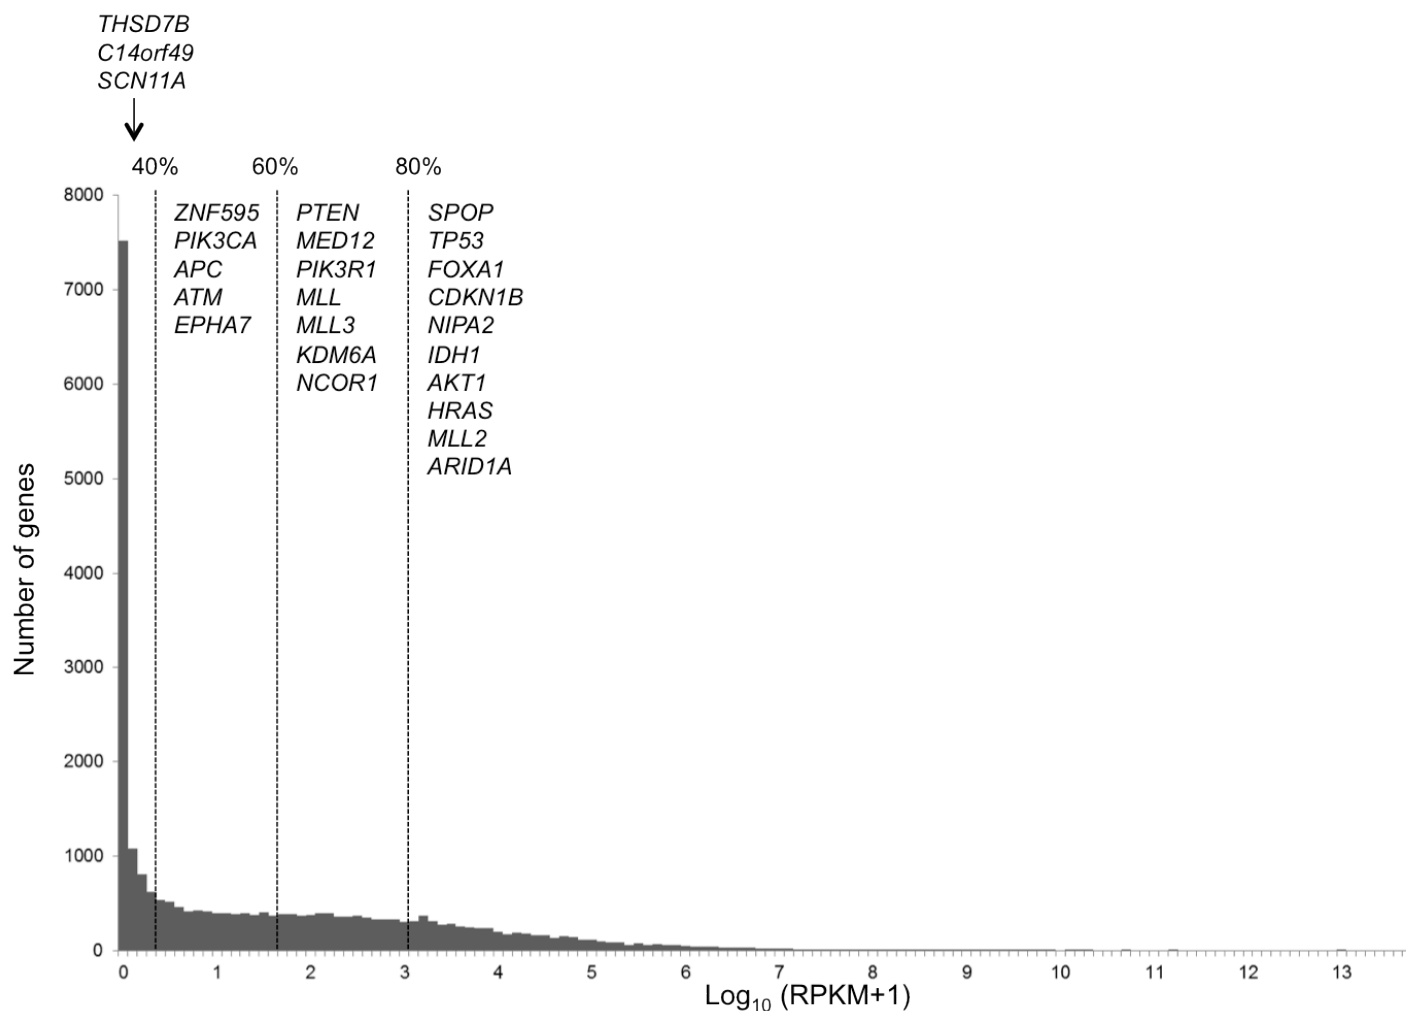

**Supplementary Figure 4. Expression levels of select mutated genes.** Significantly-mutated genes and selected genes listed in Supplementary Table 4 were analyzed for level of transcript expression in the RNA-seq dataset. The histogram shows the number of transcripts with a given value of  $\log_{10}(\text{RPKM}+1)$  (where RPKM is the number of reads per kilobase of exon per million mapped sequence reads), binned by increments of 0.1. The RPKM provides an estimate of the relative expression of transcripts. Vertical lines indicate the percentile of  $\log_{10}(\text{RPKM}+1)$  among all transcripts. Listed genes are grouped based on their percentile of  $\log_{10}(\text{RPKM}+1)$  value: <40%, 40-60%, 60-80% and >80%. Values and percentiles are listed in Supplementary Table 4.

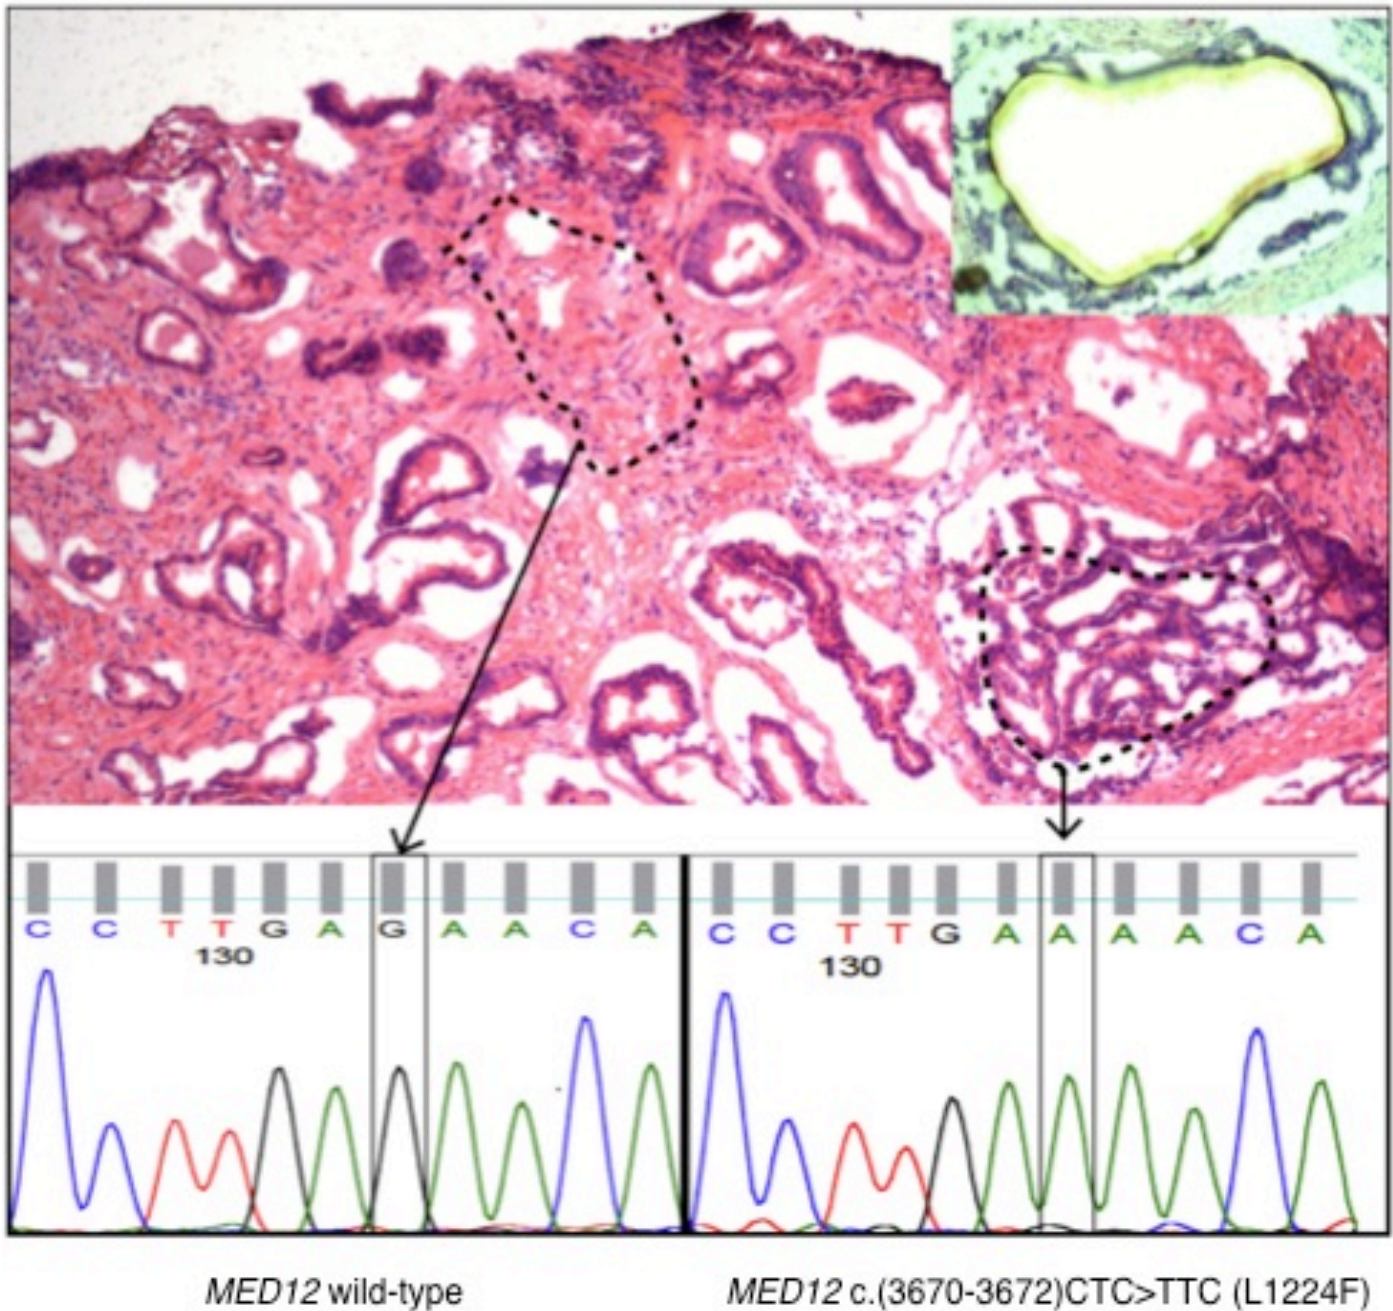

**Supplementary Figure 5. Laser capture microdissection and sequencing of *MED12*.** (Top) Laser capture micro-dissection and Sanger sequencing was performed on *MED12*-mutant tumors to determine whether the mutations were present in epithelial or stromal cells. H&E slide of frozen tissue from a *MED12*-mutant tumor (PR-3026) showing adenocarcinoma and surrounding mixed stroma. Exome sequence reads demonstrated an L1224F mutation in exon 26 of *MED12*. Laser capture micro-dissection was performed to separate epithelium from stroma (inset). (Bottom) The selected stromal area (dashed line, left) demonstrates wild-type *MED12* sequence by Sanger sequencing, while the dissected tumor gland (dashed line, right) exhibits the L1224F mutation.

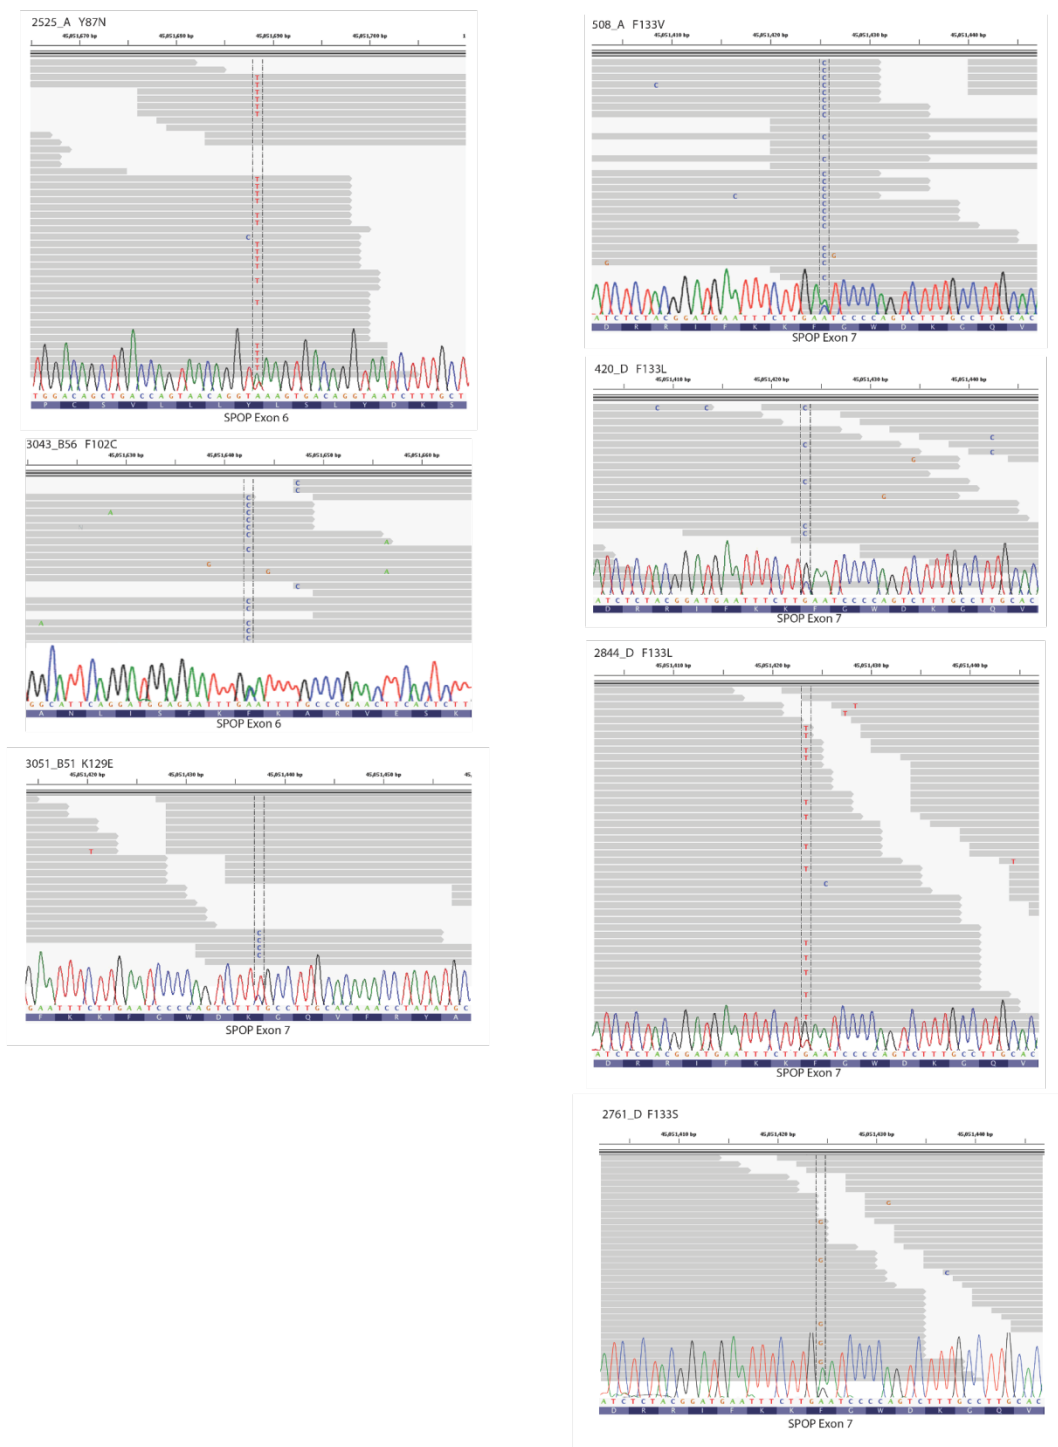

**Supplementary Figure 6. Mutations in *SPOP* in RNA-seq data and Sanger sequencing of genomic tumor DNA.** In each panel, RNA-seq reads mapping to *SPOP* Exon 6 or 7 from the indicated sample are shown. Coordinates (hg18) on chromosome 17 are at the top of each panel, and the reference genome (hg18) and wild-type *SPOP* amino acids are displayed at the bottom. Each horizontal gray bar represents one read. Nucleotide mismatches with respect to the reference genome in each read are highlighted by displaying the mismatched base. The Sanger tracing of genomic DNA from the same tumor focus is overlaid below the RNA-seq reads.

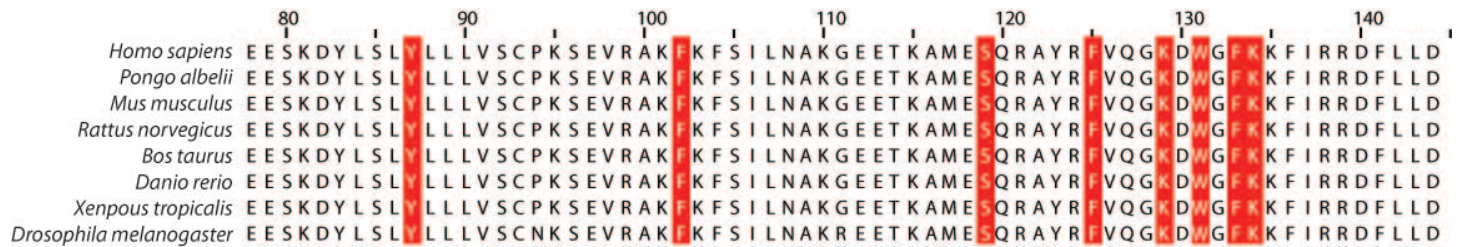

**Supplementary Figure 7. Multiple Sequence Alignment of the MATH domain of SPOP across species.** Multiple sequence alignment was performed with ClustalW2 and visualized using Jalview. Residues mutated in prostate cancer (Y87, F102, S119, F125, K129, W131, F133, K134) are highlighted.

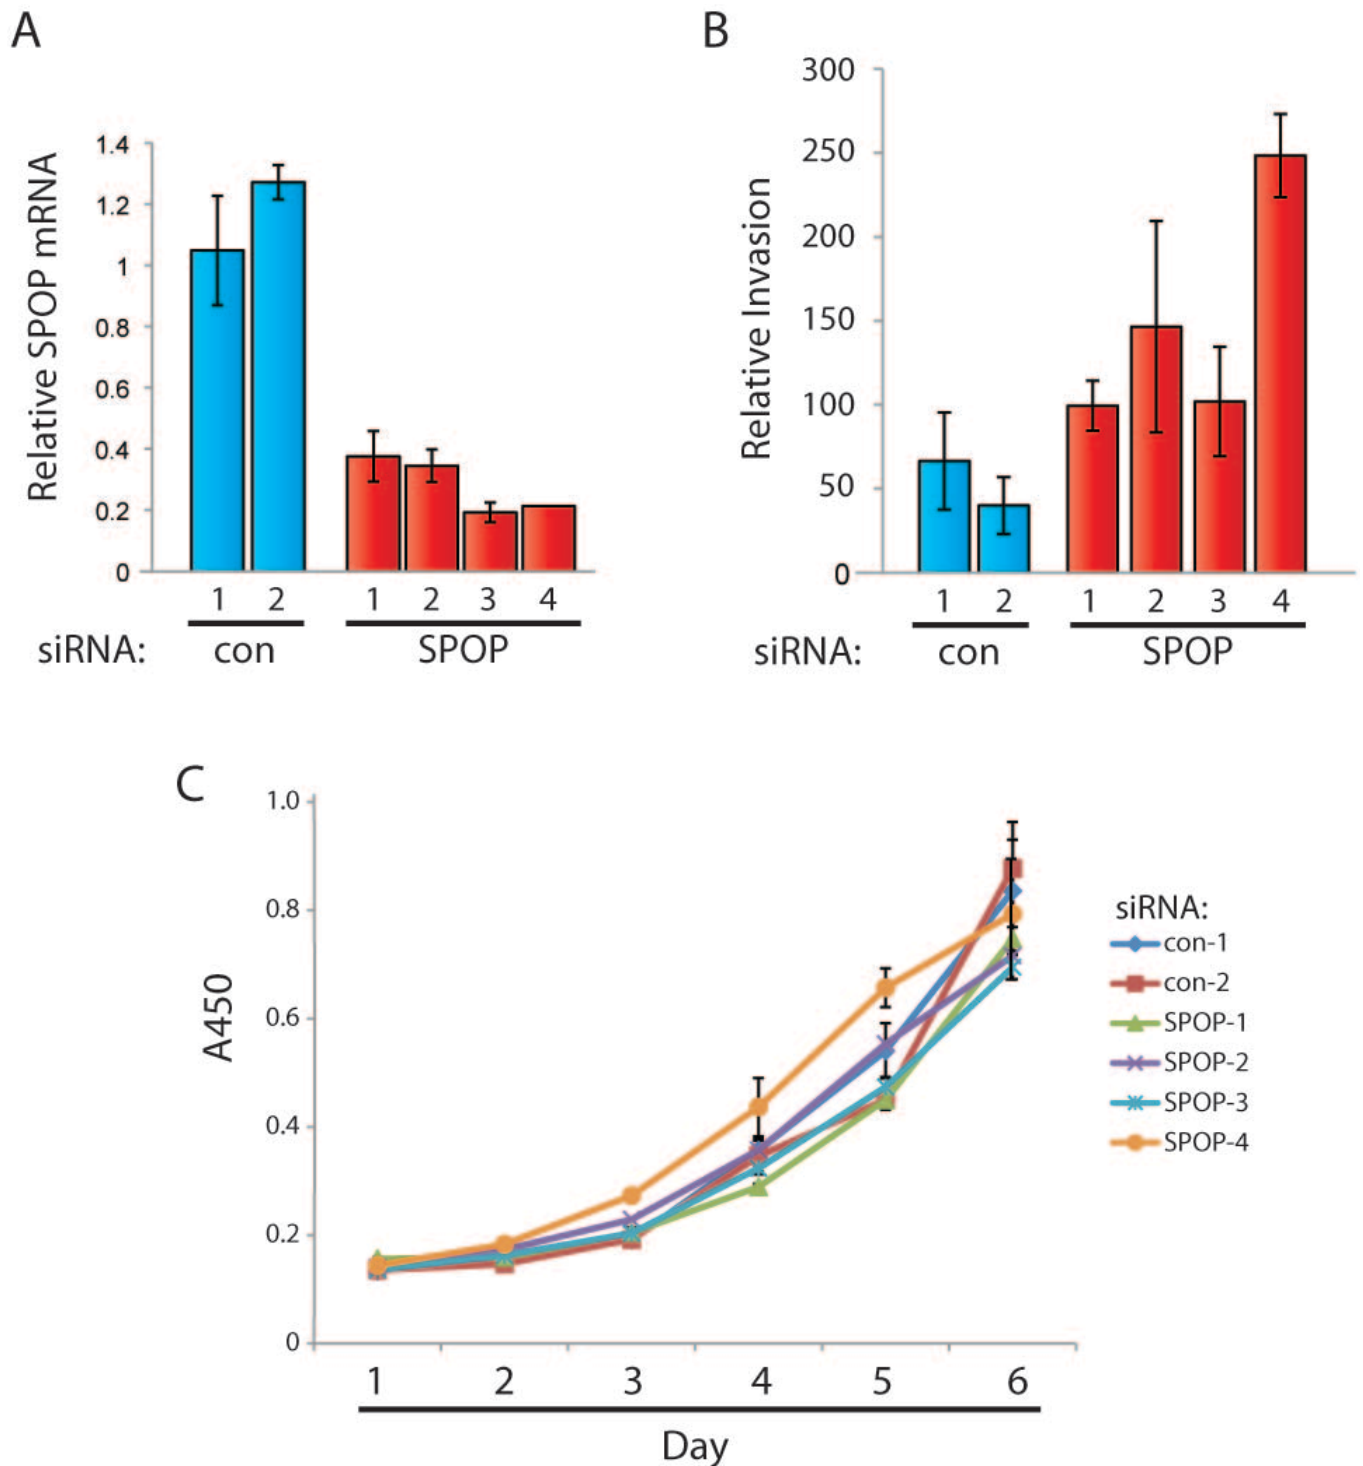

**Supplementary Figure 8. Multiple independent siRNAs targeting *SPOP* have similar effects in prostate cell lines.** (A) Expression of *SPOP* mRNA in DU145 cells transfected with 2 different control siRNAs and 4 different *SPOP* siRNAs, normalized to *GAPDH* expression, by real-time RT-PCR. (B) Quantitation of invaded DU145 cells transfected with control and *SPOP* siRNAs in Matrigel invasion assays. (C). Growth curves of DU145 cells transfected with control and *SPOP* siRNAs, measured with WST-1 assay.

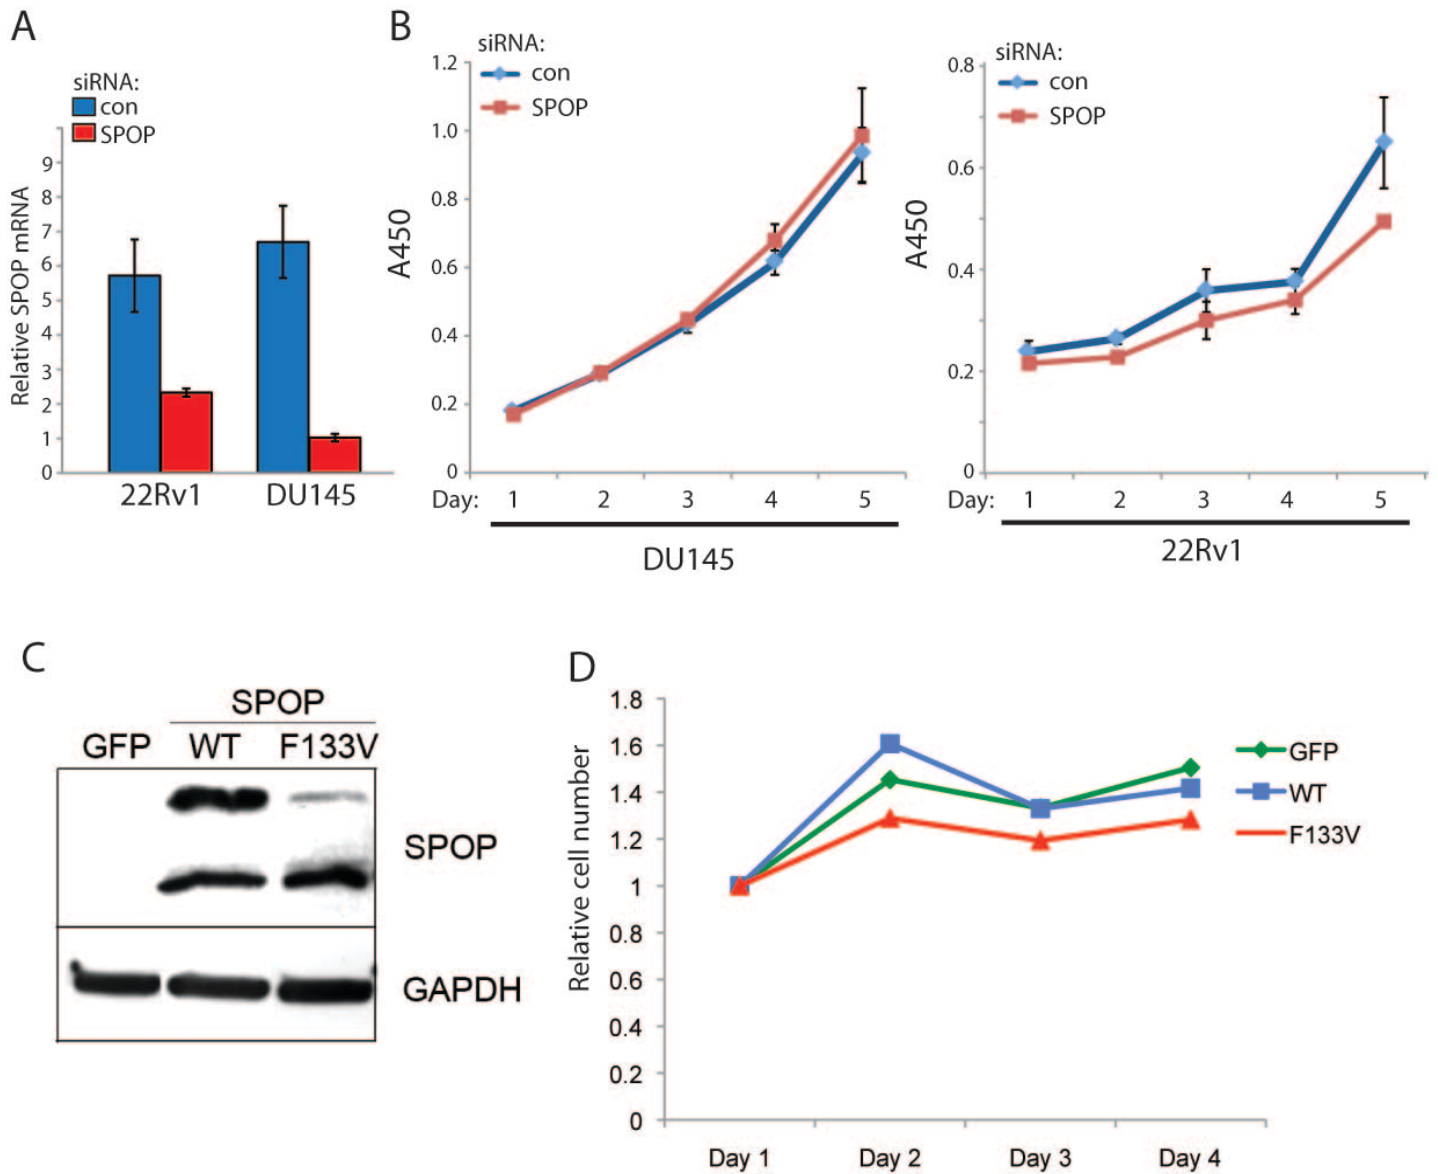

**Supplementary Figure 9. Transfection with SPOP siRNA or SPOP mutant does not affect cell growth or viability.** (A) Expression of SPOP mRNA in 22Rv1 and DU145 cells transfected with control and SPOP siRNA, normalized to GAPDH expression, by real-time RT-PCR. (B) Growth curves of 22Rv1 and DU145 cells transfected with control and SPOP siRNA, measured with WST-1 assay. (C) Western blot showing SPOP expression in DU145 cells transfected with SPOP wt and F133V. (D) Growth curves of DU145 cells transfected with SPOP wt and F133V, measured with WST-1 assay.

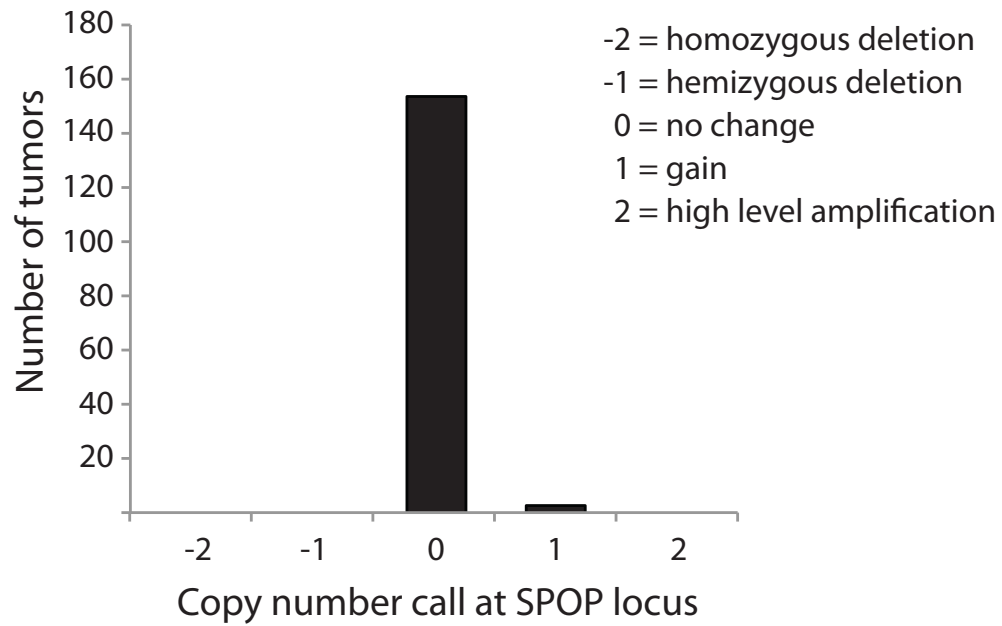

**Supplementary Figure 10. Minimal changes in *SPOP* copy number in primary prostate cancer.** Discretized copy number calls at SPOP locus in 157 primary prostate cancers, from a publicly available dataset ([www.cbioportal.org/cgx/](http://www.cbioportal.org/cgx/)).<sup>12</sup>



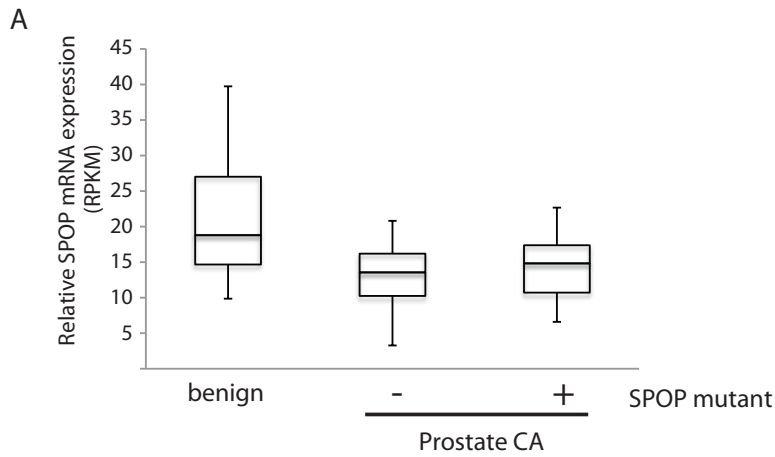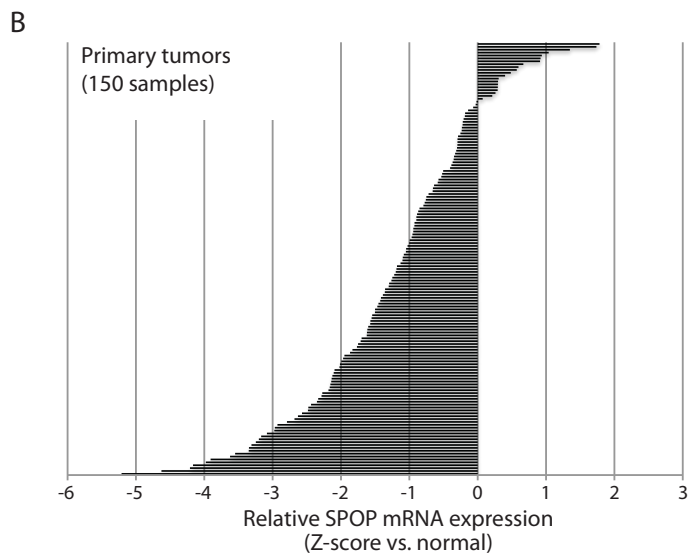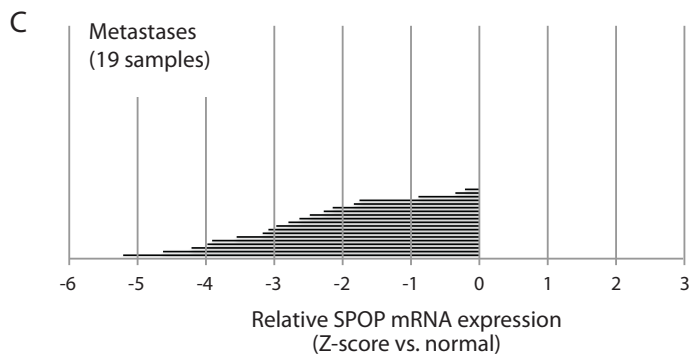

**Supplementary Figure 11. *SPOP* is not upregulated in prostate cancer.** (A) *SPOP* mRNA expression measured by RNA-seq in 6 benign prostate samples and 53 prostate cancers (7 *SPOP* mutant, 46 *SPOP* wt). Relative expression is displayed as reads Per kilobase per million mapped reads (RPKM). (B,C) *SPOP* mRNA expression from a publicly available dataset ([www.ncbi.nlm.nih.gov/geo/](http://www.ncbi.nlm.nih.gov/geo/))<sup>12</sup> in 150 primary prostate cancers (B) and 19 metastases (C). Relative expression is displayed as Z-score versus matched normal; positive = increased expression, negative = decreased expression.

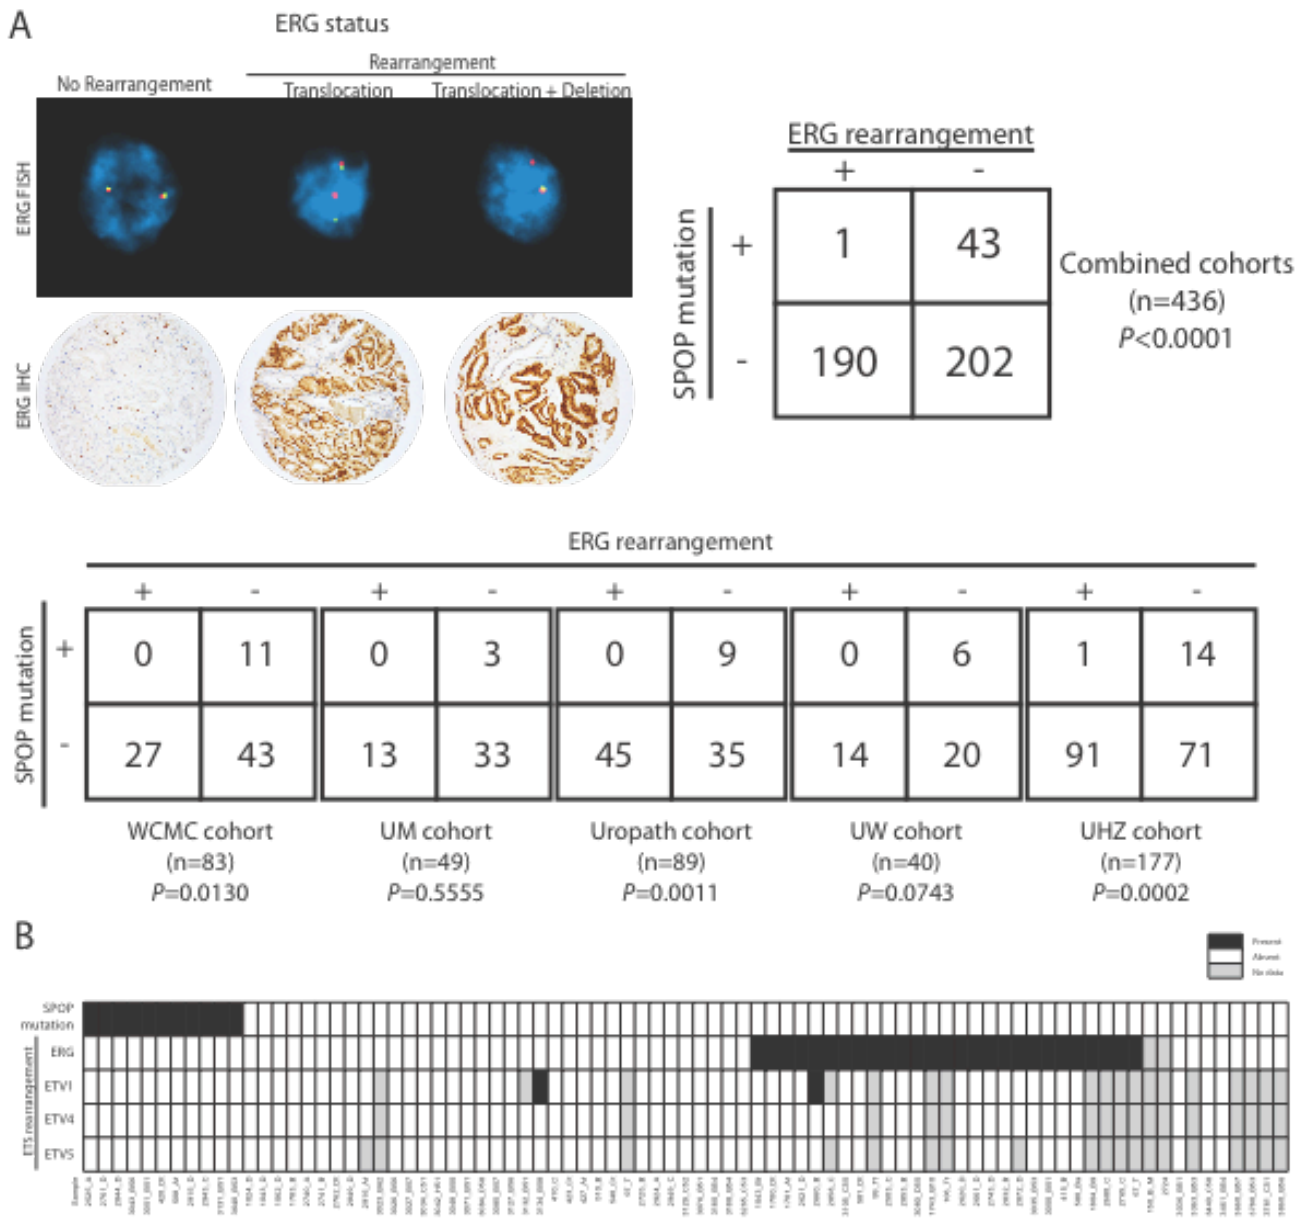

**Supplementary Figure 12. Tumors with *SPOP* mutation lack *ETS* rearrangements.** (A) Relationship of *SPOP* mutation and *ERG* rearrangement. *ERG* rearrangement was determined by FISH and IHC. (B) Heatmap showing *SPOP* mutation status and rearrangement status of *ETS* genes in WCMC cohort.

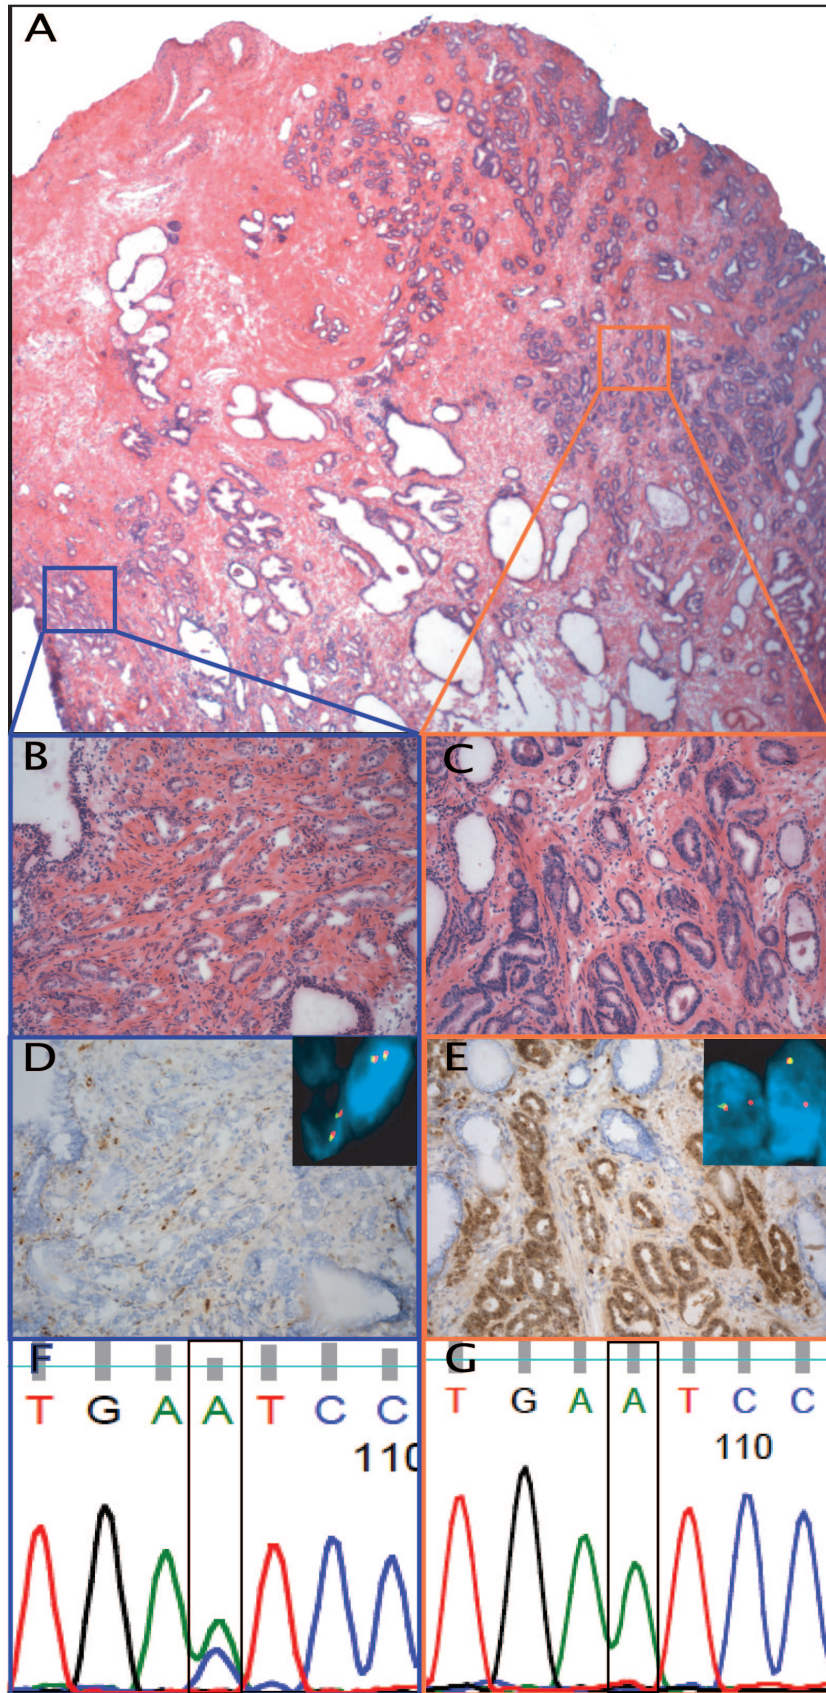

**Supplementary Figure 13. Separate foci of prostate adenocarcinoma with mutually exclusive ERG-rearranged and SPOP-mutated status.** (A) Low power view of two distinct foci of prostate adenocarcinoma in a prostatectomy specimen (H&E stained slide of frozen tissue, original magnification 2x). (B) The tumor on the left side (blue box) has Gleason score 3+4=7, is ERG-negative by immunohistochemistry (D) without *ERG* rearrangement by FISH (inset), and demonstrates F133V *SPOP*-mutation (F). (C) The tumor on the right side (orange box) has Gleason score 3+3=6, is ERG-positive by immunohistochemistry (E) with *ERG*-rearrangement by FISH (inset), and demonstrates *SPOP* wild-type sequence (F). H&E and immunohistochemistry for ERG in slides of frozen tissue, original magnification 20x; *ERG* break-apart fluorescent *in situ* hybridization assay, and *SPOP* DNA sequence by Sanger sequencing.

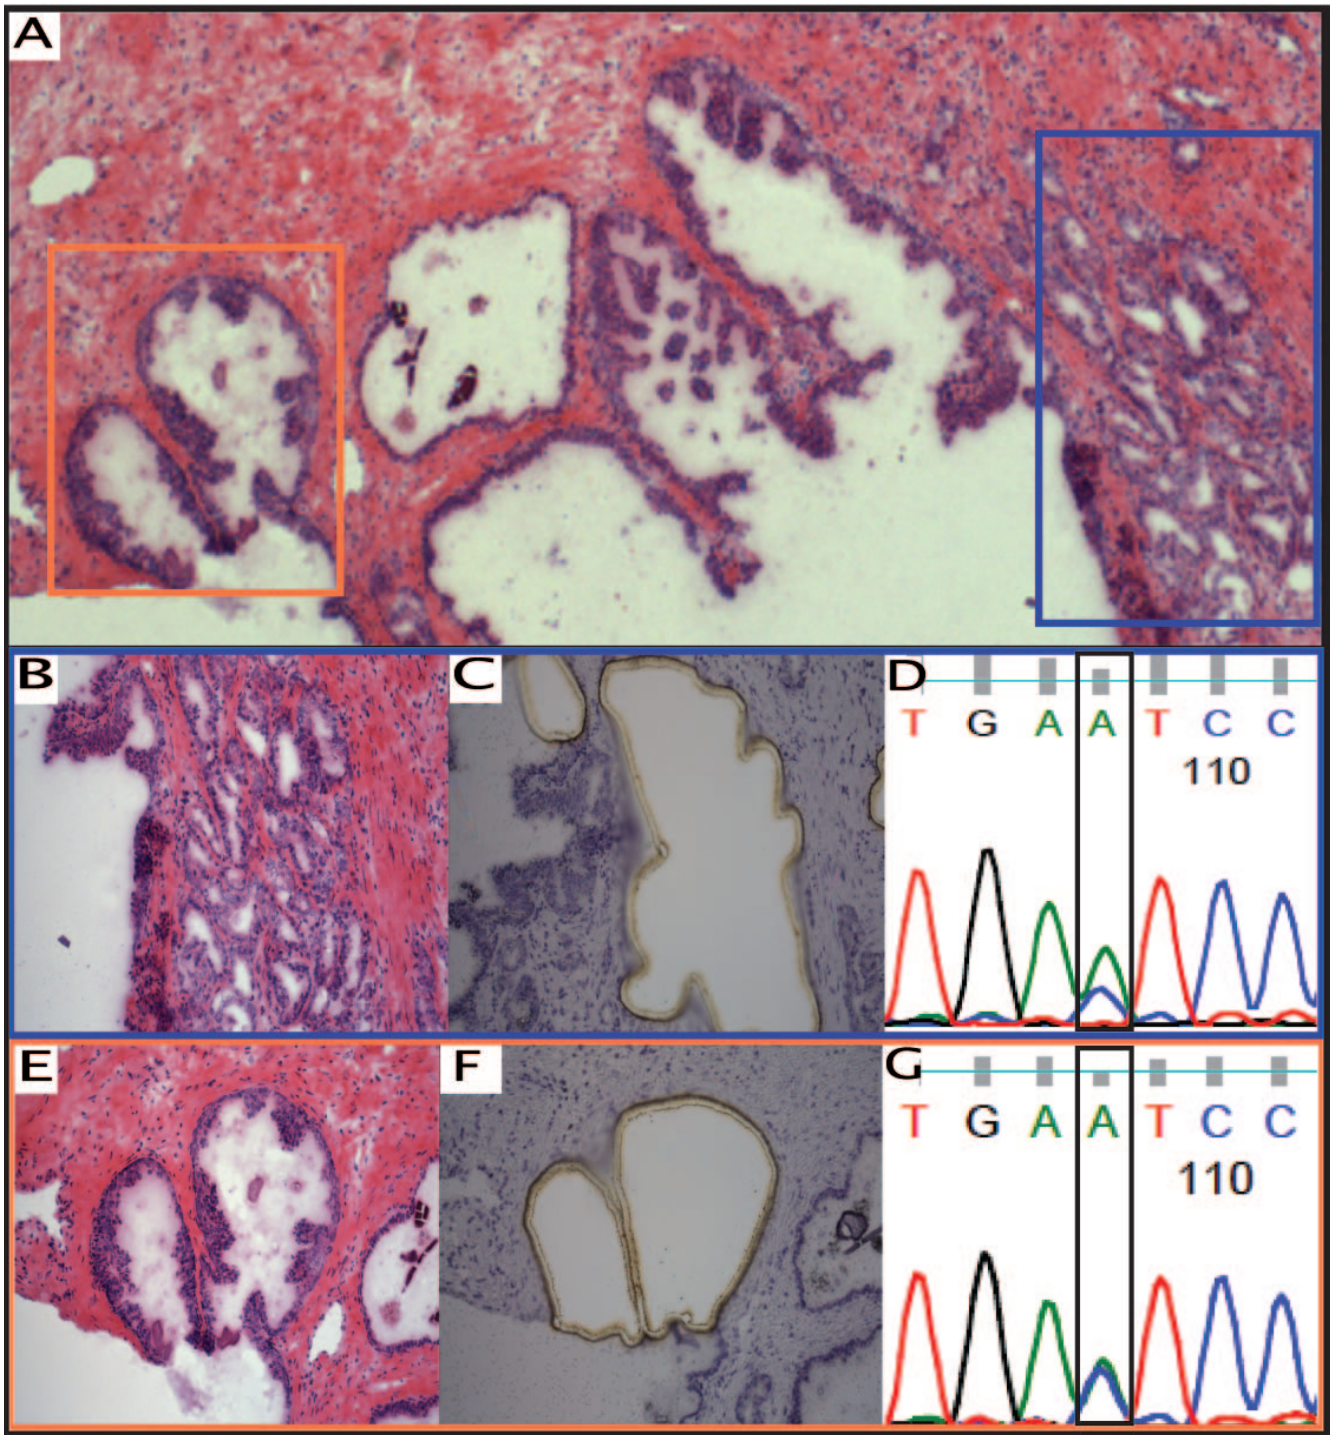

**Supplementary Figure 14. Detection of *SPOP* mutation in high-grade prostatic intraepithelial neoplasia (HGPIN).** (A) Low power view of prostate adenocarcinoma (blue box) and HGPIN (orange box) in a prostatectomy specimen. Cancer area before (B) and after (C) Laser Capture Microdissection (LCM). Images of HGPIN before (E) and after (F) LCM. DNA sequence demonstrates F133V *SPOP*-mutation in both adenocarcinoma (D) and HGPIN (G). H&E stained slide of frozen tissue, original magnification 10x; *SPOP* DNA sequence by Sanger sequencing.

A

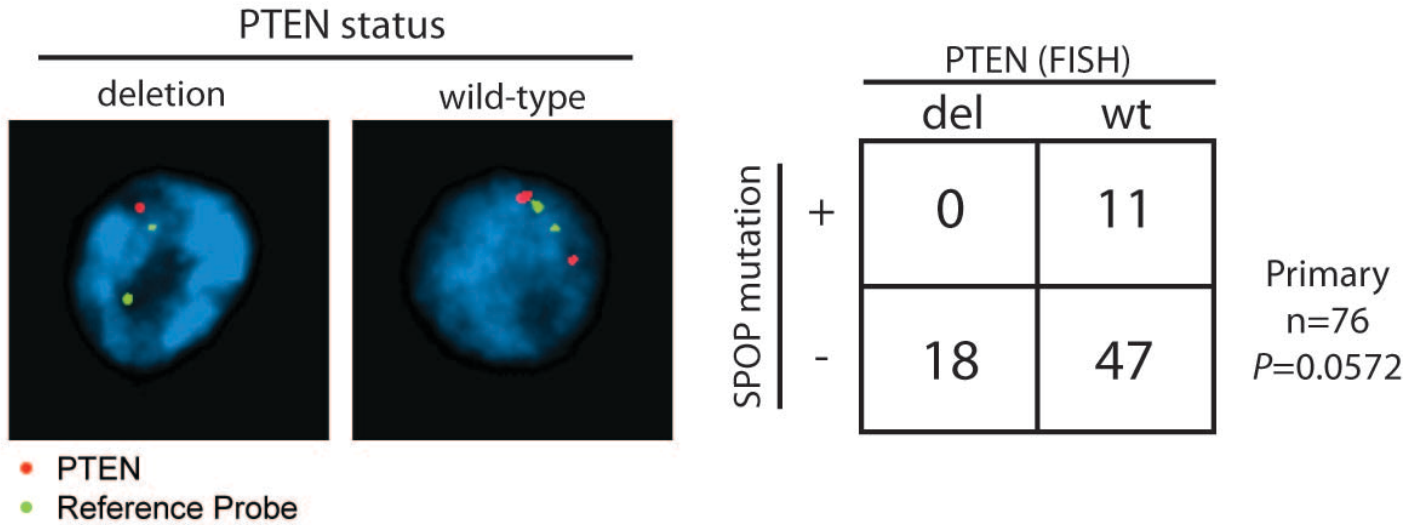

B

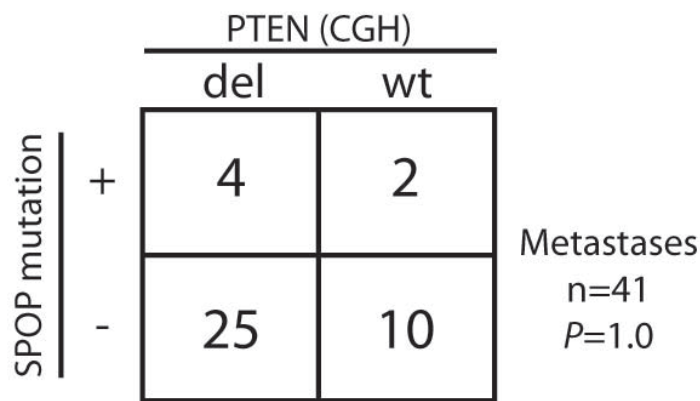

**Supplementary Figure 15. Tumors with SPOP mutation lack PTEN deletion in primary but not metastatic prostate cancer.** (A) Relationship of *SPOP* mutation and *PTEN* deletion determined by FISH in primary prostate cancers from the WCMC cohort. (B) Relationship of *SPOP* mutation and *PTEN* deletion determined by CGH in prostate cancer metastases from the UW cohort.

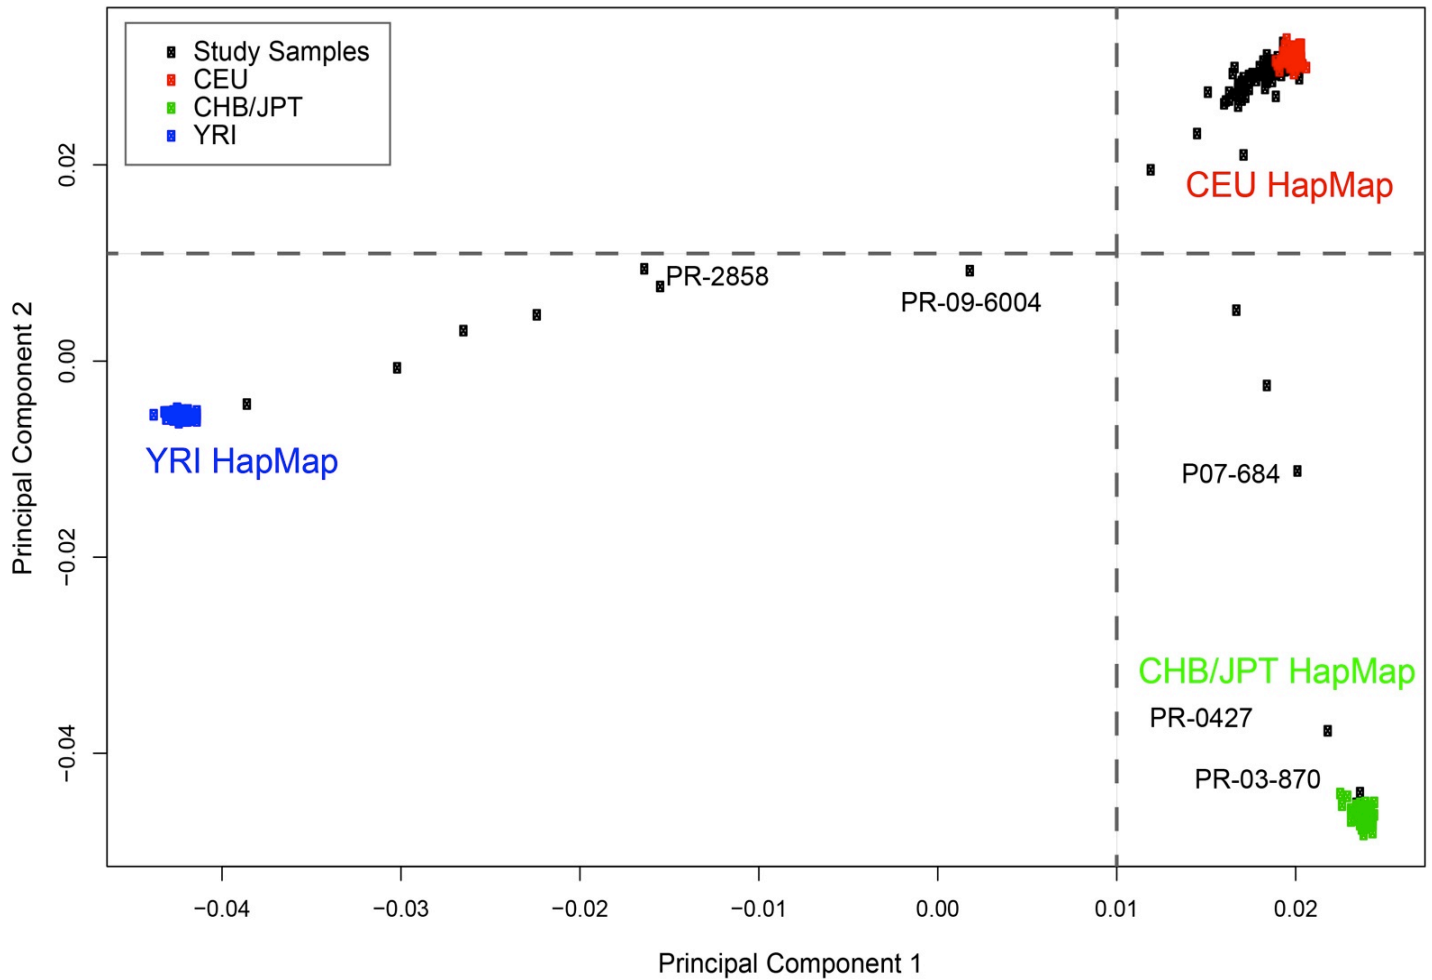

**Supplementary Figure 16. Ethnicity analysis of exome-sequenced DNA.** Principal component analysis was performed to assess the origin of the study individuals using SNP array data. HapMap Phase II samples representing three distinct populations, European (CEU) (red), Yoruban (YRI) (blue) and Chinese/Japanese (CHB/JPT) (green), were included in the analysis. The study identifiers of the exome-sequenced individuals whose genetic profiles deviate from the CEU pattern are shown.

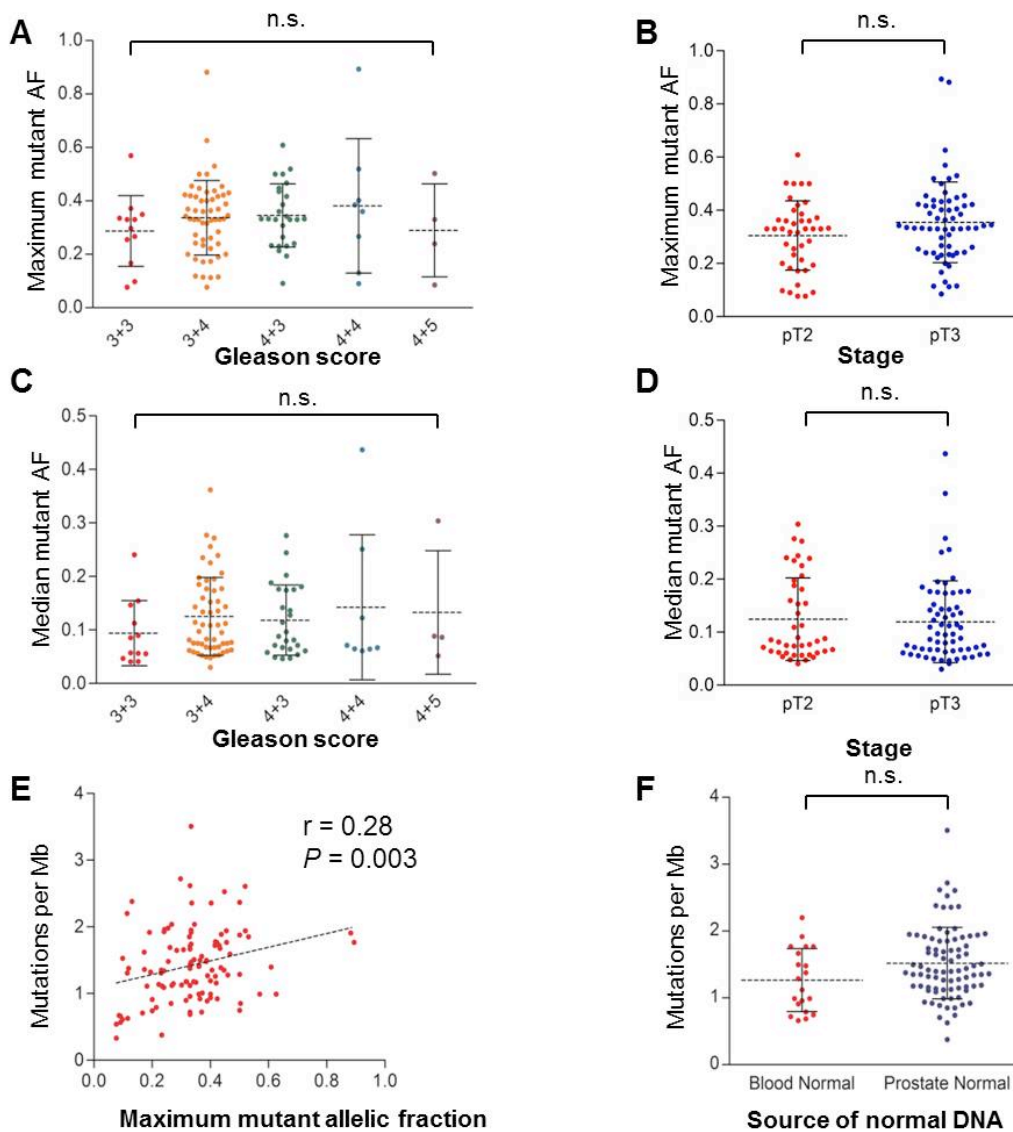

**Supplementary Figure 17. Relative ability to detect mutations in subgroups of tumors.** (A-D) The allelic fraction (AF) values of mutations were used to characterize the relative purity of cancer DNA in each tumor. (A) and (B), maximum mutant AF observed in each tumor, grouped by Gleason score and stage. The top fifth percentile of AF values was removed in each tumor to exclude values that were elevated due to copy number variation at mutated sites. (C) and (D), as in (A) and (B), but showing median AF values across all mutations for each tumor. The relative purity of cancer DNA as assessed by AF did not vary by pathological stage or Gleason score. (E) Maximum mutant AF correlated only moderately with the number of mutations detected, implying that detection of mutations in most tumors was not limited by admixture of normal DNA. (F) Mutations per Mb sequenced in tumors grouped by source of paired normal DNA: peripheral blood (n=22) or non-cancerous prostate (n=89). No difference in mutation rates was observed between the two groups. Two-tailed p values were calculated using the Mann Whitney (two groups) or Kruskal-Wallis (multiple groups) tests and the Spearman test for correlation. Error bars indicate standard deviation. n.s., not significant. Statistical analysis was performed using GraphPad Prism.

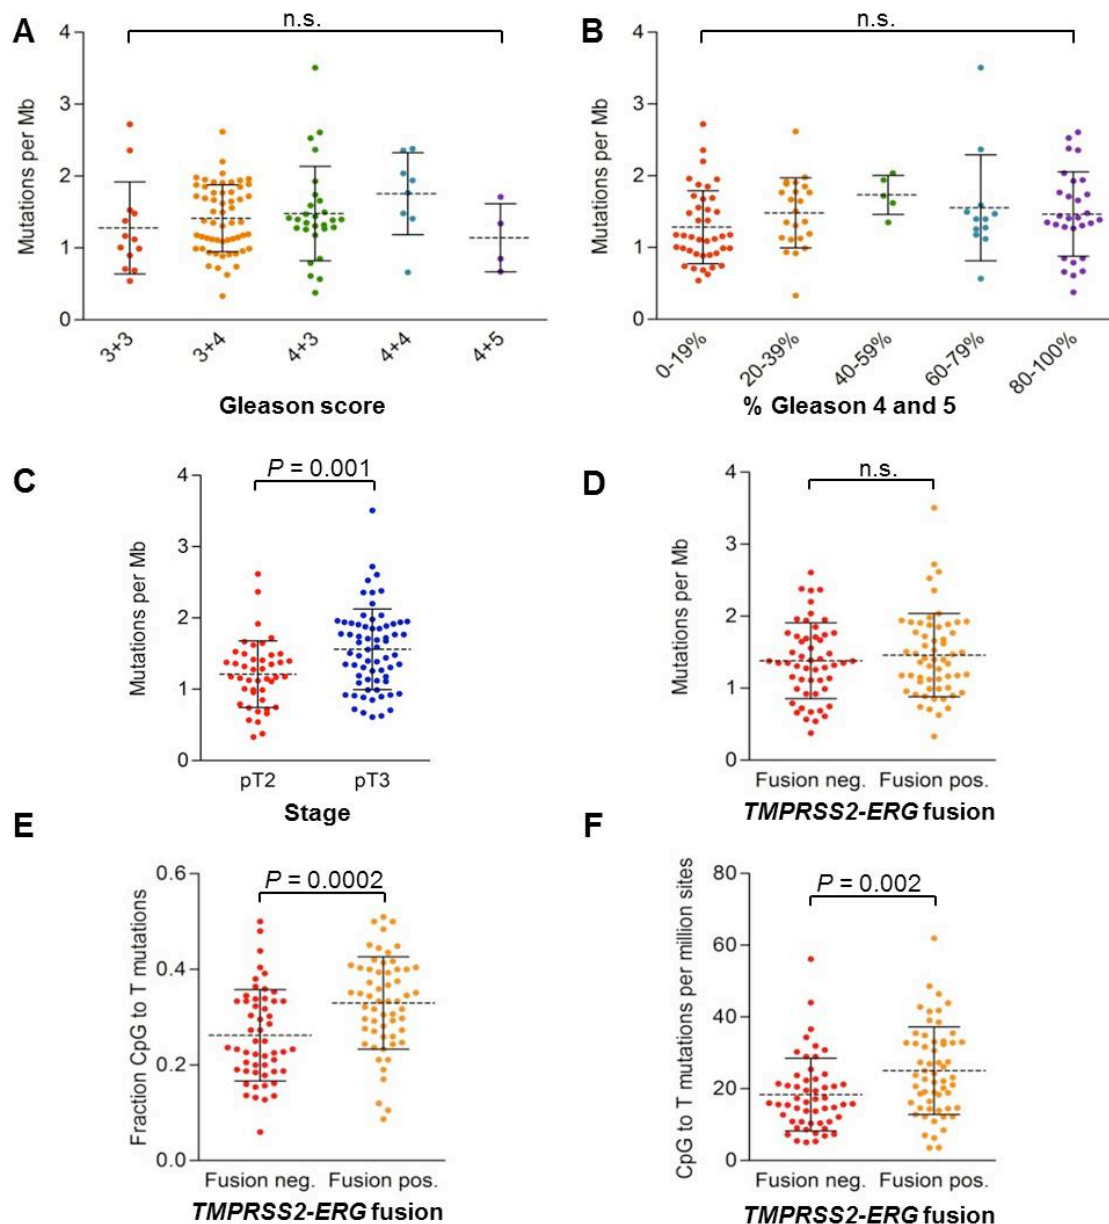

**Supplementary Figure 18. Mutational landscape across a spectrum of primary prostate cancers.** (A-D) Mutations per Mb of covered DNA sequence for 111 primary prostatic adenocarcinomas grouped by clinical parameters. The horizontal axes denote: (A) Gleason score (major pattern + minor pattern); (B) Percent of cancer with Gleason pattern 4 or 5 histology; (C) Pathological tumor stage, where T3 indicates extra-prostatic extension; (D) Presence or absence of the *TMPRSS2-ERG* fusion based on fluorescence in-situ hybridization (FISH). Mutation rates are higher in pT3 tumors but do not vary by Gleason pattern or *TMPRSS2-ERG* fusion status. (E) Fraction of mutations in each tumor that are C to T transitions at CpG sites. (F) Number of CpG to T transitions per million CpG sites. Both the number and proportion of CpG to T mutations is increased in *TMPRSS2-ERG* fusion positive tumors. Two-tailed p values from the Mann Whitney test (two groups) or Kruskal-Wallis test (multiple groups) are indicated for each comparison. Statistical analysis was performed using GraphPad Prism. Error bars indicate standard deviation. n.s., not significant.



### Supplementary References:

- 54 Rubin, M. A. *et al.* Rapid ("warm") autopsy study for procurement of metastatic prostate cancer. *Clin. Cancer Res.* **6**, 1038-1045, (2000).
- 55 Trotman, L. C. *et al.* Pten dose dictates cancer progression in the prostate. *PLoS Biol.* **1**, E59, (2003).
- 56 McMenamin, M. E. *et al.* Loss of PTEN expression in paraffin-embedded primary prostate cancer correlates with high Gleason score and advanced stage. *Cancer Res.* **59**, 4291-4296, (1999).
- 57 Kim, J. H. *et al.* Deep sequencing reveals distinct patterns of DNA methylation in prostate cancer. *Genome Res.* **21**, 1028-1041, (2011).
- 58 Carver, B. S. *et al.* Aberrant ERG expression cooperates with loss of PTEN to promote cancer progression in the prostate. *Nat. Genet.* **41**, 619-624, (2009).
- 59 King, J. C. *et al.* Cooperativity of TMPRSS2-ERG with PI3-kinase pathway activation in prostate oncogenesis. *Nat. Genet.* **41**, 524-526, (2009).
- 60 Gao, L. & Alumkal, J. Epigenetic regulation of androgen receptor signaling in prostate cancer. *Epigenetics* **5**, 100-104, (2010).
- 61 Cooperberg, M. R., Hilton, J. F. & Carroll, P. R. The CAPRA-S score: A straightforward tool for improved prediction of outcomes after radical prostatectomy. *Cancer* **117**, 5039-5046, (2011).
- 62 Dang, L. *et al.* Cancer-associated IDH1 mutations produce 2-hydroxyglutarate. *Nature* **462**, 739-744, (2009).
- 63 Parsons, D. W. *et al.* An integrated genomic analysis of human glioblastoma multiforme. *Science* **321**, 1807-1812, (2008).
- 64 Carpten, J. D. *et al.* A transforming mutation in the pleckstrin homology domain of AKT1 in cancer. *Nature* **448**, 439-444, (2007).
- 65 Carter, B. S., Epstein, J. I. & Isaacs, W. B. Ras gene mutations in human prostate cancer. *Cancer Res.* **50**, 6830-6832 (1990).
- 66 Buhrman, G., Wink, G. & Mattos, C. Transformation efficiency of RasQ61 mutants linked to structural features of the switch regions in the presence of Raf. *Structure* **15**, 1618-1629, (2007).
- 67 Canman, C. E. Activation of the ATM Kinase by Ionizing Radiation and Phosphorylation of p53. *Science* **281**, 1677-1679, (1998).
- 68 Greenman, C. *et al.* Patterns of somatic mutation in human cancer genomes. *Nature* **446**, 153-158, (2007).
- 69 Sasaki, T. *et al.* ATM mutations in patients with ataxia telangiectasia screened by a hierarchical strategy. *Human Mutation* **12**, 186-195, (1998).
- 70 Miyaki, M. *et al.* Characteristics of somatic mutation of the adenomatous polyposis coli gene in colorectal tumors. *Cancer Res.* **54**, 3011-3020 (1994).
- 71 Beroud, C. & Soussi, T. APC gene: database of germline and somatic mutations in human tumors and cell lines. *Nucleic Acids Res.* **24**, 121-124 (1996).
- 72 Urlick, M. E. *et al.* PIK3R1 (p85alpha) is somatically mutated at high frequency in primary endometrial cancer. *Cancer Res.* **71**, 4061-4067, (2011).

- 73 Pasqualucci, L. *et al.* Analysis of the coding genome of diffuse large B-cell lymphoma. *Nat. Genet.* **43**, 830-837, (2011).
- 74 Parsons, D. W. *et al.* The genetic landscape of the childhood cancer medulloblastoma. *Science* **331**, 435-439, (2011).
- 75 van Haafden, G. *et al.* Somatic mutations of the histone H3K27 demethylase gene UTX in human cancer. *Nat. Genet.* **41**, 521-523, (2009).
- 76 Gui, Y. *et al.* Frequent mutations of chromatin remodeling genes in transitional cell carcinoma of the bladder. *Nat. Genet.* **43**, 875-878, (2011).
- 77 Wiegand, K. C. *et al.* ARID1A mutations in endometriosis-associated ovarian carcinomas. *N. Engl. J. Med.* **363**, 1532-1543, (2010).
- 78 Oricchio, E. *et al.* The eph-receptor a7 is a soluble tumor suppressor for follicular lymphoma. *Cell* **147**, 554-564, (2011).
- 79 Guan, M., Xu, C., Zhang, F. & Ye, C. Aberrant methylation of EphA7 in human prostate cancer and its relation to clinicopathologic features. *Int. J. Cancer* **124**, 88-94, (2009).
- 80 Jones, S. *et al.* Frequent mutations of chromatin remodeling gene ARID1A in ovarian clear cell carcinoma. *Science* **330**, 228-231, (2010).
- 81 Dalgliesh, G. L. *et al.* Systematic sequencing of renal carcinoma reveals inactivation of histone modifying genes. *Nature* **463**, 360-363, (2010).
- 82 Varela, I. *et al.* Exome sequencing identifies frequent mutation of the SWI/SNF complex gene PBRM1 in renal carcinoma. *Nature* **469**, 539-542, (2011).
- 83 Jones, S. *et al.* Core signaling pathways in human pancreatic cancers revealed by global genomic analyses. *Science* **321**, 1801-1806, (2008).
- 84 Sjoblom, T. *et al.* The consensus coding sequences of human breast and colorectal cancers. *Science* **314**, 268-274, (2006).
- 85 Stephens, P. J. *et al.* Complex landscapes of somatic rearrangement in human breast cancer genomes. *Nature* **462**, 1005-1010, (2009).
- 86 Ley, T. J. *et al.* DNA sequencing of a cytogenetically normal acute myeloid leukaemia genome. *Nature* **456**, 66-72, (2008).
- 87 Mardis, E. R. *et al.* Recurring mutations found by sequencing an acute myeloid leukemia genome. *N. Engl. J. Med.* **361**, 1058-1066, (2009).
- 88 Pleasance, E. D. *et al.* A comprehensive catalogue of somatic mutations from a human cancer genome. *Nature* **463**, 191-196, (2010).
- 89 Pleasance, E. D. *et al.* A small-cell lung cancer genome with complex signatures of tobacco exposure. *Nature* **463**, 184-190, (2010).

**Supplementary Table S1A. Clinical Characteristics of Exome-Sequenced Primary Prostate Cancers**

Summary of exome-sequenced patient cohort

| <b>Characteristic</b>                              | <b>Whole exome-sequenced tumors</b> |              |
|----------------------------------------------------|-------------------------------------|--------------|
| <b>Age, years</b>                                  |                                     |              |
| Median (range)                                     | 63                                  | (34 – 77)    |
| <b>Pre-operative Serum PSA (ng/μL)</b>             |                                     |              |
| Median (range)                                     | 7.8                                 | (2.7 – 31.5) |
| <b>Pathologic Stage, N %</b>                       |                                     |              |
| Stage pT2 Total                                    | 44                                  | 39%          |
| Stage pT2a                                         | 4                                   | 4%           |
| Stage pT2b                                         | 1                                   | 1%           |
| Stage pT2c                                         | 39                                  | 35%          |
| Stage pT3 Total                                    | 68                                  | 61%          |
| Stage pT3a                                         | 49                                  | 44%          |
| Stage pT3b                                         | 19                                  | 17%          |
| <b>Gleason Pattern (major + minor), N %*</b>       |                                     |              |
| Gleason 3+3                                        | 13                                  | 12%          |
| Gleason 3+4                                        | 58                                  | 52%          |
| Gleason 4+3                                        | 29                                  | 26%          |
| Gleason 4+4                                        | 8                                   | 7%           |
| Gleason 4+5                                        | 4                                   | 4%           |
| <b>Percentage of Gleason Pattern 4 and 5, N %*</b> |                                     |              |
| 0-19%                                              | 40                                  | 36%          |
| 20-39%                                             | 23                                  | 12%          |
| 40-59%                                             | 5                                   | 5%           |
| 60-79%                                             | 12                                  | 11%          |
| 80-100%                                            | 29                                  | 26%          |
| <b>TMPRSS2-ERG Fusion Status, N % †</b>            |                                     |              |
| Fusion-negative                                    | 53                                  | 48%          |
| Fusion with interstitial deletion                  | 34                                  | 31%          |
| Fusion without interstitial deletion               | 24                                  | 22%          |

\* Gleason scores based on review of hematoxylin and eosin slides from site of tumor chosen for DNA extraction and sequencing

† *TMPRSS2-ERG* fusion status assessed by fluorescence *in situ* hybridization (FISH)

**Supplementary Table S1B. Clinical Characteristics of Exome-Sequenced Primary Prostate Cancers**

Clinical information for individual patients

| Patient    | Age | Gleason Score | GS % 4 and 5 | Stage  | Serum PSA |  | TMPRSS2-ERG Fusion Status           | mod CAPRA-S * |
|------------|-----|---------------|--------------|--------|-----------|--|-------------------------------------|---------------|
|            |     |               |              |        | (ng/mL)   |  |                                     |               |
| P00-000450 | 59  | 4+3           | 80           | pT3a   | 8.3       |  | Positive with interstitial deletion | 4             |
| P01-28     | 61  | 4+4           | 100          | pT3a   | 14        |  | Negative                            | 6             |
| P02-1562   | 67  | 4+3           | 95           | pT3b   | 5.4       |  | Negative                            | 5             |
| P02-2035   | 63  | 3+4           | 20           | pT2c   | 5.8       |  | Positive                            | 1             |
| P03-1334   | 69  | 3+4           | 2            | pT3a   | 5.6       |  | Negative                            | 2             |
| P03-1426   | 69  | 4+3           | 60           | pT2c   | 13.9      |  | Positive                            | 4             |
| P03-1906   | 75  | 3+4           | 30           | pT3b   | 12.2      |  | Positive                            | 6             |
| P03-2345   | 56  | 3+4           | 10           | pT2c   | 7         |  | Positive with interstitial deletion | 2             |
| P03-2620   | 68  | 3+4           | 20           | pT3a   | 12.5      |  | Negative                            | 4             |
| P03-3391   | 62  | 3+3           | 0            | pT3b   | 18.6      |  | Positive                            | 5             |
| P03-595    | 58  | 4+5           | 100          | pT3a   | 24        |  | Positive with interstitial deletion | 7             |
| P03-871    | 59  | 4+3:5         | 60           | pT2c   | 6.5       |  | Positive                            | 3             |
| P04-1084   | 65  | 3+4           | 40           | pT3a   | 22        |  | Negative                            | 5             |
| P04-1243   | 63  | 3+4           | 30           | pT3a   | 7.3       |  | Positive with interstitial deletion | 3             |
| P04-1421   | 54  | 3+4           | 20           | pT2a   | 8.4       |  | Positive                            | 2             |
| P04-1790   | 56  | 4+3:5         | 75           | pT3a   | 9         |  | Positive with interstitial deletion | 4             |
| P04-2599   | 68  | 4+3           | 60           | pT2c   | 6.9       |  | Negative                            | 3             |
| P04-2641   | 56  | 3+4           | 20           | pT3a   | 6         |  | Negative                            | 3             |
| P04-2666   | 58  | 4+5:3         | 95           | pT3a   | 5         |  | Negative                            | 4             |
| P04-2740   | 71  | 4+3           | 70           | pT3a   | 11        |  | Positive                            | 5             |
| P04-47     | 55  | 4+3:5         | 82           | pT2b   | 14.6      |  | Negative                            | 4             |
| P04-594    | 66  | 3+4           | 5            | pT3a   | 8.5       |  | Negative                            | 3             |
| P05-2212   | 66  | 3+4           | 30           | pT3a   | 9.3       |  | Positive with interstitial deletion | 3             |
| P05-2594   | 60  | 3+4           | 20           | pT3b   | 13.5      |  | Negative                            | 6             |
| P05-3436   | 62  | 4+3           | 80           | pT2c   | 5.3       |  | Positive                            | 2             |
| P05-3829   | 59  | 3+3           | 0            | pT2c   | 10.8      |  | Negative                            | 2             |
| P05-3852   | 62  | 4+3:5         | 60           | pT3a   | 12.5      |  | Negative                            | 5             |
| P05-3859   | 68  | 4+3           | 80           | pT3a   | 8.2       |  | Negative                            | 4             |
| P05-620    | 59  | 4+3           | 90           | pT3a   | 5.8       |  | Negative                            | 3             |
| P06-1125   | 66  | 3+4           | 30           | pT3a   | 5.6       |  | Positive with interstitial deletion | 2             |
| P06-1696   | 64  | 4+3:5         | 80           | pT3a   | 4.6       |  | Negative                            | 4             |
| P06-2325   | 62  | 4+3           | 70           | pT2c   | 6.8       |  | Negative                            | 3             |
| P06-3676   | 59  | 3+4           | 15           | pT3a   | 4.8       |  | Positive                            | 2             |
| P06-3939   | 71  | 4+5           | 100          | pT3bN1 | 8.3       |  | Negative                            | 8             |
| P06-4428   | 47  | 3+4           | 20           | pT3a   | 31.5      |  | Positive with interstitial deletion | 5             |
| P07-144    | 65  | 3+4           | 30           | pT3a   | 2.7       |  | Negative                            | 2             |
| P07-360    | 57  | 4+4           | 100          | pT2c   | 16.7      |  | Negative                            | 5             |
| P07-5036   | 52  | 3+4:5         | 60           | pT3a   | 5.2       |  | Positive                            | 2             |
| P07-684    | 58  | 4+3           | 90           | pT3b   | 9.4       |  | Negative                            | 6             |
| P07-718    | 57  | 3+4           | 5            | pT2c   | 6.4       |  | Negative                            | 2             |
| P07-837    | 69  | 4+3           | 80           | pT3a   | 7.8       |  | Negative                            | 4             |
| P08-2516   | 75  | 4+4           | 100          | pT3b   | 9         |  | Negative                            | 7             |
| P08-590    | 65  | 3+4           | 5            | pT2c   | 9.2       |  | Positive with interstitial deletion | 2             |
| P09-120    | 61  | 3+4           | 5            | pT2c   | 6         |  | Positive                            | 1             |
| P09-1372   | 73  | 3+4           | 5            | pT3a   | 6.2       |  | Positive with interstitial deletion | 3             |
| P09-1580   | 62  | 3+4:5         | 50           | pT3a   | 5.2       |  | Positive                            | 2             |
| P09-2497   | 62  | 3+3           | 0            | pT3a   | 8         |  | Positive with interstitial deletion | 2             |
| P09-649    | 71  | 4+3           | 80           | pT2c   | 8.1       |  | Negative                            | 3             |
| PR-00-1165 | 54  | 3+4           | 5            | pT3b   | 6.7       |  | Negative                            | 5             |
| PR-00-160  | 60  | 3+4           | 40           | pT2c   | 9.4       |  | Negative                            | 2             |
| PR-00-1823 | 60  | 3+4:5         | 12           | pT3a   | 6.9       |  | Positive with interstitial deletion | 3             |
| PR-0099    | 70  | 3+4           | 10           | pT3a   | 10.3      |  | Positive                            | 4             |
| PR-01-1934 | 59  | 3+4           | 20           | pT3b   | 6.7       |  | Negative                            | 4             |
| PR-01-2382 | 50  | 3+4           | 10           | pT3a   | 6.2       |  | Positive                            | 4             |
| PR-01-2492 | 67  | 3+4           | 10           | pT3a   | Not known |  | Negative                            | NA            |
| PR-01-2554 | 69  | 4+3           | 90           | pT3b   | 8.9       |  | Positive                            | 5             |
| PR-02-1082 | 61  | 3+4           | 30           | pT3b   | 11.5      |  | Positive with interstitial deletion | 6             |
| PR-02-169  | 65  | 3+4           | 20           | pT2c   | 10.6      |  | Positive with interstitial deletion | 3             |
| PR-02-1736 | 58  | 3+4           | 5            | pT3b   | 13        |  | Negative                            | 5             |
| PR-02-1899 | 66  | 3+3           | 0            | pT3a   | 13.4      |  | Positive with interstitial deletion | 3             |
| PR-02-2072 | 54  | 4+3:5         | 62           | pT3a   | 9         |  | Positive with interstitial deletion | 4             |
| PR-02-2480 | 69  | 3+4           | 20           | pT3b   | 10.4      |  | Positive with interstitial deletion | 5             |
| PR-02-254  | 74  | 4+3           | 70           | pT3b   | 17.6      |  | Positive                            | 7             |
| PR-03-322  | 70  | 3+4           | 10           | pT3a   | 9.7       |  | Positive                            | 3             |
| PR-03-1026 | 56  | 4+3:5         | 85           | pT3a   | 12.8      |  | Positive                            | 3             |
| PR-03-870  | 52  | 4+3           | 90           | pT3a   | 5.3       |  | Negative                            | 5             |
| PR-04-1367 | 53  | 3+3           | 0            | pT2c   | 9.9       |  | Positive with interstitial deletion | 1             |
| PR-0415    | 71  | 4+4           | 100          | pT3a   | 7.6       |  | Positive with interstitial deletion | 5             |
| PR-04-194  | 65  | 3+4           | 30           | pT2c   | 7.1       |  | Positive with interstitial deletion | 2             |
| PR-0427    | 69  | 4+3           |              | pT2a   | 5.1       |  | Negative                            | 1             |
| PR-04-3113 | 66  | 3+3           | 0            | pT3b   | 12        |  | Positive                            | 4             |
| PR-04-3222 | 66  | 3+4           | 5            | pT2c   | 5.2       |  | Negative                            | 1             |
| PR-04-3347 | 59  | 3+3           | 0            | pT2c   | 7.5       |  | Negative                            | 1             |
| PR-04-639  | 61  | 3+4           | 5            | pT3a   | 5.1       |  | Negative                            | 2             |
| PR-04-903  | 68  | 3+4           | 5            | pT3a   | 7.8       |  | Positive with interstitial deletion | 3             |
| PR-05-3440 | 63  | 4+3           | 80           | pT3a   | 8.5       |  | Positive with interstitial deletion | 4             |
| PR-05-3595 | 64  | 3+4           | 50           | pT2c   | 7.2       |  | Negative                            | 2             |
| PR-05-839  | 69  | 3+4           | 30           | pT2a   | 9         |  | Negative                            | 2             |
| PR-06-1651 | 60  | 4+5:3         | 95           | pT2c   | 5.8       |  | Positive with interstitial deletion | 3             |
| PR-06-1749 | 60  | 4+3           | 60           | pT2c   | 6.7       |  | Negative                            | 3             |
| PR-06-1999 | 56  | 3+4           | 40           | pT2a   | 30        |  | Positive                            | 4             |
| PR-09-2517 | 64  | 3+4           | 5            | pT3a   | 14        |  | Positive with interstitial deletion | 4             |
| PR-09-2744 | 48  | 3+3           | 0            | pT3a   | 4.4       |  | Positive with interstitial deletion | 1             |
| PR-09-2767 | 58  | 4+4           | 100          | pT3a   | 4.6       |  | Positive with interstitial deletion | 4             |
| PR-09-3421 | 65  | 3+4           | 10           | pT3a   | 4.8       |  | Positive with interstitial deletion | 2             |
| PR-09-3586 | 65  | 4+3           | 80           | pT3a   | 5         |  | Positive with interstitial deletion | 3             |
| PR-09-3687 | 73  | 3+4           | 5            | pT2c   | 7.8       |  | Positive                            | 2             |
| PR-09-5094 | 77  | 4+4           | 100          | pT3b   | 17        |  | Negative                            | 7             |
| PR-09-5245 | 72  | 4+4           | 100          | pT3a   | 6.1       |  | Negative                            | 5             |
| PR-09-5446 | 67  | 3+3           | 0            | pT2c   | 13        |  | Positive with interstitial deletion | 2             |
| PR-09-5630 | 64  | 4+3           | 60           | pT3b   | 14        |  | Positive with interstitial deletion | 7             |
| PR-09-5700 | 60  | 3+4           | 20           | pT3a   | 14        |  | Positive                            | 4             |
| PR-09-5702 | 68  | 3+4           | 20           | pT2c   | 8.2       |  | Positive with interstitial deletion | 2             |
| PR-1024    | 73  | 3+4:5         | 22           | pT3b   | 7.2       |  | Negative                            | 4             |
| PR-1043    | 59  | 3+3           | 0            | pT2c   | 4.9       |  | Positive                            | 0             |
| PR-2661    | 59  | 3+3           | 0            | pT2c   | 4.5       |  | Positive with interstitial deletion | 0             |
| PR-2682    | 71  | 4+3           | 80           | pT2c   | 7.6       |  | Negative                            | 3             |
| PR-2740    | 58  | 3+3           | 0            | pT2c   | 2.8       |  | Negative                            | 0             |
| PR-2761    | 56  | 3+3           | 0            | pT2c   | 4.3       |  | Negative                            | 0             |
| PR-2762    | 68  | 3+4           | 5            | pT2c   | 5.5       |  | Negative                            | 1             |
| PR-2858    | 52  | 3+4           | N/A          | pT3a   | 5.3       |  | Positive                            | 2             |
| PR-2872    | 62  | 3+4           | 5            | pT3a   | 6         |  | Positive with interstitial deletion | 2             |
| PR-2915    | 66  | 3+4           | 30           | pT2c   | 3.6       |  | Negative                            | 1             |
| PR-2916    | 65  | 3+4           | 2            | pT3a   | 9.1       |  | Negative                            | 3             |
| PR-3023    | 67  | 4+3           | 95           | pT2c   | 5         |  | Negative                            | 2             |
| PR-3026    | 56  | 3+4           | 20           | pT3b   | 24.2      |  | Negative                            | 7             |
| PR-3034    | 70  | 4+4           | 100          | pT2c   | 14.6      |  | Negative                            | 5             |
| PR-3035    | 34  | 3+4           | 5            | pT2c   | 4.2       |  | Positive with interstitial deletion | 1             |
| PR-3036    | 47  | 3+4           | 5            | pT2c   | 5.1       |  | Negative                            | 1             |
| PR-3048    | 64  | 3+4           | 10           | pT2c   | 3.5       |  | Negative                            | 1             |
| PR-3051    | 60  | 3+4           | 20           | pT2c   | 20        |  | Negative                            | 3             |
| PR-3127    | 55  | 3+4           | 2            | pT2c   | 4.2       |  | Negative                            | 1             |

\* Modified CAPRA-S score, derived from CAPRA-S score (61) without including surgical margins

Supplementary Table S4. Mutations in Significantly-Mutated Genes and other Selected Genes

Selected mutations detected by exome sequencing are annotated based on the indicated UCSC Genome Browser identifier. Additional mutations detected by Sanger sequencing or transcriptome sequencing of independent tumors are also listed. Mutations are grouped by three categories: (1) Mutations in significantly mutated genes. (2) Mutations previously reported in cancer. (3) Selected genes with damaging mutations (splice site-alteration, truncation or frame-shift) and are inactivated by similar mutations in other cancer types. References are listed that support the role of either the particular mutation (for missense mutations) or the type of mutation (for nonsense, frame-shift or splice site mutations) in promoting cancer or other neoplasms. "RNA" denotes the median log<sub>2</sub>(RPKM+1) value for each transcript across 63 tumors that underwent transcriptome sequencing. fs, frame-shift mutation; del, deletion; CV, coefficient of variation.

| Category                                                                                | Gene symbol (Annotation transcript) | Patient                         | Genomic coordinates (hg19)     | Variant type                     | Codon change                 | Protein change         | Median RNA          | Mean RNA             | RNA CV               | RNA Percentile | References |                |           |     |  |
|-----------------------------------------------------------------------------------------|-------------------------------------|---------------------------------|--------------------------------|----------------------------------|------------------------------|------------------------|---------------------|----------------------|----------------------|----------------|------------|----------------|-----------|-----|--|
| 1. Significantly mutated genes (q-value < 0.1)                                          | <b>SPOP</b> (uc010dbk.2)            | P04-2599                        | g.chr17:47696425A>G            | Missense                         | c.(397-399)TTC>TCC           | p.F133S                | 3.88                | 3.78                 | 0.13                 | 88%            |            |                |           |     |  |
|                                                                                         |                                     | P07-684                         | g.chr17:47696448A>T            | Missense                         | c.(373-375)TTT>TTA           | p.F126L                |                     |                      |                      |                |            |                |           |     |  |
|                                                                                         |                                     | P07-837                         | g.chr17:47696424C>G            | Missense                         | c.(397-399)TTC>TTG           | p.F133L                |                     |                      |                      |                |            |                |           |     |  |
|                                                                                         |                                     | P06-649                         | g.chr17:47696467C>T            | Missense                         | c.(355-357)AGT>AAT           | p.S119N                |                     |                      |                      |                |            |                |           |     |  |
|                                                                                         |                                     | PR-00-160                       | g.chr17:47696421C>G            | Missense                         | c.(400-402)AAG>AAC           | p.K134N                |                     |                      |                      |                |            |                |           |     |  |
|                                                                                         |                                     | PR-01-2492                      | g.chr17:47696425A>C            | Missense                         | c.(397-399)TTC>TGC           | p.F133C                |                     |                      |                      |                |            |                |           |     |  |
|                                                                                         |                                     | PR-04-3222                      | g.chr17:47696424G>T            | Missense                         | c.(397-399)TTC>TTA           | p.F133L                |                     |                      |                      |                |            |                |           |     |  |
|                                                                                         |                                     | PR-05-839                       | g.chr17:47696689A>T            | Missense                         | c.(259-261)TAC>AAC           | p.Y87N                 |                     |                      |                      |                |            |                |           |     |  |
|                                                                                         |                                     | PR-09-5245                      | g.chr17:47696432A>C            | Missense                         | c.(391-393)TGG>GGG           | p.W131G                |                     |                      |                      |                |            |                |           |     |  |
|                                                                                         |                                     | PR-2961                         | g.chr17:47696426A>C            | Missense                         | c.(397-399)TTC>GTC           | p.F133V                |                     |                      |                      |                |            |                |           |     |  |
|                                                                                         |                                     | PR-2740                         | g.chr17:47696424C>T            | Missense                         | c.(397-399)TTC>TTA           | p.F133L                |                     |                      |                      |                |            |                |           |     |  |
|                                                                                         |                                     | PR-2761                         | g.chr17:47696425A>G            | Missense                         | c.(397-399)TTC>TCC           | p.F133S                |                     |                      |                      |                |            |                |           |     |  |
|                                                                                         |                                     | PR-2915                         | g.chr17:47696426A>C            | Missense                         | c.(397-399)TTC>GTC           | p.F133V                |                     |                      |                      |                |            |                |           |     |  |
|                                                                                         |                                     | PR-3051                         | g.chr17:47696438T>C            | Missense                         | c.(385-387)AAA>GAA           | p.K129E                |                     |                      |                      |                |            |                |           |     |  |
|                                                                                         |                                     | STD0000000420_D (RNA-seq)       | g.chr17:47696424G>C            | Missense                         | c.(397-399)TTC>TTG           | p.F133L                |                     |                      |                      |                |            |                |           |     |  |
|                                                                                         |                                     | STD0000000508_A (RNA-seq)       | g.chr17:47696426A>C            | Missense                         | c.(397-399)TTC>GTC           | p.F133V                |                     |                      |                      |                |            |                |           |     |  |
|                                                                                         |                                     | STD00000002525_A (RNA-seq)      | g.chr17:47696689A>T            | Missense                         | c.(259-261)TAC>AAC           | p.Y87N                 |                     |                      |                      |                |            |                |           |     |  |
|                                                                                         |                                     | STD00000002844_D (RNA-seq)      | g.chr17:47696424G>T            | Missense                         | c.(397-399)TTC>TTA           | p.F133L                |                     |                      |                      |                |            |                |           |     |  |
|                                                                                         |                                     | STD00000002943_C (Sanger seq)   | g.chr17:47696688T>C            | Missense                         | c.(259-261)TAC>TGC           | p.Y87C                 |                     |                      |                      |                |            |                |           |     |  |
|                                                                                         |                                     | STD00000003043_B56 (Sanger seq) | g.chr17:47696643A>C            | Missense                         | c.(304-306)TTC>TGC           | p.F102C                |                     |                      |                      |                |            |                |           |     |  |
|                                                                                         |                                     | STD00000003131_B51 (Sanger seq) | g.chr17:47696425A>C            | Missense                         | c.(397-399)TTC>TGC           | p.F133C                |                     |                      |                      |                |            |                |           |     |  |
|                                                                                         |                                     | STD00000003640_B53 (RNA-seq)    | g.chr17:47696688T>C            | Missense                         | c.(259-261)TAC>TGC           | p.Y87C                 |                     |                      |                      |                |            |                |           |     |  |
|                                                                                         |                                     | <b>TP53</b> (uc002gjm.2)        | P03-871                        | P03-871                          | g.chr17:7579417-7579426(del) | Frame shift deletion   | c.(259-270)fs       | p.P87fs              | 3.99                 | 3.95           | 0.16       | 89%            |           |     |  |
|                                                                                         |                                     |                                 |                                | P04-1243                         | g.chr17:7577121G>A           | Missense               | c.(817-819)CGT>TGT  | p.R273C              |                      |                |            |                |           |     |  |
|                                                                                         |                                     |                                 |                                | P06-4428                         | g.chr17:7577547C>T           | Missense               | c.(733-735)GGG>GAC  | p.G245D              |                      |                |            |                |           |     |  |
|                                                                                         |                                     |                                 |                                | P06-4428                         | g.chr17:7578457C>T           | Missense               | c.(472-474)CGG>CAC  | p.R158H              |                      |                |            |                |           |     |  |
|                                                                                         |                                     |                                 |                                | P07-5036                         | g.chr17:7577538C>T           | Missense               | c.(742-744)CGG>CAG  | p.R248Q              |                      |                |            |                |           |     |  |
|                                                                                         |                                     |                                 |                                | PR-02-254                        | g.chr17:7578542G>A           | Missense               | c.(388-390)CTC>TTC  | p.L130F              |                      |                |            |                |           |     |  |
|                                                                                         |                                     |                                 |                                | PR-0415                          | g.chr17:7575259A>T           | Missense               | c.(751-753)ATC>AAC  | p.I251N              |                      |                |            |                |           |     |  |
|                                                                                         |                                     |                                 |                                | PR-05-1999                       | g.chr17:7573593G>A           | Missense               | c.(328-330)CGT>TGT  | p.R110C              |                      |                |            |                |           |     |  |
|                                                                                         |                                     |                                 |                                | <b>PTEN</b> (uc001kb.2)          | P04-1790                     | P04-1790               | g.chr10:89692900C>C | Missense             | c.(382-384)AAG>AAC   | p.K128N        | 2.78       | 2.55           | 0.29      | 75% |  |
|                                                                                         |                                     |                                 |                                |                                  |                              | P06-3676               | g.chr10:89692905G>A | Missense             | c.(388-390)CGA>CAA   | p.R130Q        |            |                |           |     |  |
|                                                                                         |                                     |                                 |                                |                                  |                              | PR-02-254              | g.chr10:89720857C>G | Nonsense             | c.(1006-1008)TAC>TAG | p.Y336*        |            |                |           |     |  |
|                                                                                         |                                     |                                 |                                |                                  |                              | PR-02-254              | g.chr10:89692901G>C | Missense             | c.(385-387)GGA>CGA   | p.G129R        |            |                |           |     |  |
|                                                                                         |                                     |                                 |                                | <b>FOXK1</b> (uc001wuf.2)        | P05-620                      | P05-620                | g.chr10:89711874G>A | Splice site mutation | N/A                  | p.G165_splice  | 6.92       | 6.94           | 0.09      | 99% |  |
| PR-04-1367                                                                              | g.chr14:38081294G>A                 | Missense                        | c.(694-696)GCA>GTA             |                                  |                              | p.A232V                |                     |                      |                      |                |            |                |           |     |  |
| PR-0427                                                                                 | g.chr14:38081231A>C                 | Missense                        | c.(757-759)ATG>AGG             |                                  |                              | p.M253R                |                     |                      |                      |                |            |                |           |     |  |
| PR-09-3687                                                                              | g.chr14:38081313C>T                 | Missense                        | c.(676-678)GAC>AAC             |                                  |                              | p.D226N                |                     |                      |                      |                |            |                |           |     |  |
| STD00000003071_B51 (RNA-seq)                                                            | g.chr14:38081231A>C                 | Missense                        | c.(757-759)ATG>AGG             |                                  |                              | p.M253R                |                     |                      |                      |                |            |                |           |     |  |
| STD0000000423_C1 (RNA-seq)                                                              | g.chr14:38081231A>T                 | Missense                        | c.(757-759)ATG>AAG             |                                  |                              | p.M253K                |                     |                      |                      |                |            |                |           |     |  |
| STD00000016350_B53T (RNA-seq)                                                           | g.chr14:38081313C>T                 | Missense                        | c.(676-678)GAC>AAC             |                                  |                              | p.D226N                |                     |                      |                      |                |            |                |           |     |  |
| STD00000002832_C (RNA-seq)                                                              | g.chr14:38081313C>A                 | Missense                        | c.(676-678)GAC>TAC             |                                  |                              | p.D226Y                |                     |                      |                      |                |            |                |           |     |  |
| <b>CDKN1B</b> (uc001rat.2)                                                              | P00-000450                          | P00-000450                      | g.chr12:12870910A>G            | Missense                         | c.(136-138)GAG>GGG           | p.E46G                 | 3.90                | 3.72                 | 0.15                 | 88%            |            |                |           |     |  |
|                                                                                         |                                     | P03-1426                        | g.chr12:12871788-12871788(del) | Frame shift deletion             | c.(505-507)fs                | p.R169fs               |                     |                      |                      |                |            |                |           |     |  |
|                                                                                         |                                     | PR-00-160                       | g.chr12:12871228-12871228(del) | Frame shift deletion             | c.(454-456)fs                | p.R152fs               |                     |                      |                      |                |            |                |           |     |  |
|                                                                                         |                                     | P03-1334                        | g.chr4:59330T>C                | Missense                         | c.(10-12)GTA>GCA             | p.V4A                  | 1.23                | 1.25                 | 0.36                 | 53%            |            |                |           |     |  |
|                                                                                         |                                     | P04-594                         | g.chr4:59357T>A                | Missense                         | c.(37-39)TTC>TAC             | p.F13Y                 |                     |                      |                      |                |            |                |           |     |  |
|                                                                                         |                                     | PR-09-3687                      | g.chr4:65889A>T                | Missense                         | c.(493-495)ATA>TTA           | p.I165L                |                     |                      |                      |                |            |                |           |     |  |
| <b>THSD7B</b> (uc002va.1)                                                               | PR-01-1934                          | P01-1934                        | g.chr2:138163182G>C            | Splice site mutation             | N/A                          | p.A803_splice          | 0.07                | 0.13                 | 1.41                 | 27%            |            |                |           |     |  |
|                                                                                         |                                     | PR-03-1026                      | g.chr2:137988713C>T            | Missense                         | c.(1729-1731)ACC>ATG         | p.T577M                |                     |                      |                      |                |            |                |           |     |  |
|                                                                                         |                                     | PR-05-839                       | g.chr2:138000058C>T            | Missense                         | c.(2089-2091)CGC>TGC         | p.R697C                |                     |                      |                      |                |            |                |           |     |  |
|                                                                                         |                                     | PR-09-2767                      | g.chr2:138373832C>G            | Missense                         | c.(3424-3426)GTG>CTG         | p.V1142L               |                     |                      |                      |                |            |                |           |     |  |
|                                                                                         |                                     | PR-09-2702                      | g.chr2:138033591C>A            | Missense                         | c.(2401-2403)ACA>AAA         | p.T801K                |                     |                      |                      |                |            |                |           |     |  |
| <b>MED12</b> (uc004dy.2)                                                                | P04-594                             | P04-594                         | g.chrX:70349258C>T             | Missense                         | c.(1627-1629)CGC>TGC         | p.R543C                |                     |                      |                      |                |            |                |           |     |  |
|                                                                                         |                                     | P07-684                         | g.chrX:70349258C>T             | Missense                         | c.(3670-3672)CTC>TTC         | p.L1224F               | 2.92                | 2.93                 | 0.12                 | 77%            |            |                |           |     |  |
|                                                                                         |                                     | PR-00-160                       | g.chrX:70344951C>A             | Missense                         | c.(3928-3930)CCA>CAA         | p.P1310Q               |                     |                      |                      |                |            |                |           |     |  |
|                                                                                         |                                     | PR-3026                         | g.chrX:70349258C>T             | Missense                         | c.(2179-2181)GAC>GAA         | p.D727E                |                     |                      |                      |                |            |                |           |     |  |
|                                                                                         |                                     | PR-3026                         | g.chrX:70349258C>T             | Missense                         | c.(3670-3672)CTC>TTC         | p.L1224F               |                     |                      |                      |                |            |                |           |     |  |
|                                                                                         |                                     | PR-3026                         | g.chrX:70349258C>T             | Missense                         | c.(3670-3672)CTC>TTC         | p.L1224F               |                     |                      |                      |                |            |                |           |     |  |
| <b>MIPAA</b> (uc001yux.2)                                                               | P03-1906                            | P03-1906                        | g.chr15:23012398A>C            | Missense                         | c.(328-330)CCT>CGT           | p.L110R                | 3.58                | 3.61                 | 0.17                 | 85%            |            |                |           |     |  |
|                                                                                         |                                     | P07-837                         | g.chr15:23006670G>A            | Missense                         | c.(634-636)GTG>TTG           | p.V212L                |                     |                      |                      |                |            |                |           |     |  |
|                                                                                         |                                     | PR-09-3421                      | g.chr15:23014493C>A            | Missense                         | c.(232-234)CGG>TCG           | p.A78S                 |                     |                      |                      |                |            |                |           |     |  |
|                                                                                         |                                     | PR-04-639                       | g.chr3:178952085A>G            | Missense                         | c.(3139-3141)CAT>CGT         | p.H1047R               | 1.39                | 1.31                 | 0.28                 | 55%            |            |                |           |     |  |
|                                                                                         |                                     | PR-09-2517                      | g.chr3:178917478G>A            | Missense                         | c.(352-354)AGT>GAT           | p.G118D                |                     |                      |                      |                |            |                |           |     |  |
|                                                                                         |                                     | PR-09-2744                      | g.chr3:178936095A>C            | Missense                         | c.(1636-1638)CAG>CCG         | p.Q546P                |                     |                      |                      |                |            |                |           |     |  |
| <b>C14orf49</b> (uc001yei.3)                                                            | P00-000450                          | P00-000450                      | g.chr3:178952006T>C            | Missense                         | c.(3061-3063)TAC>CAC         | p.Y1021H               |                     |                      |                      |                |            |                |           |     |  |
|                                                                                         |                                     | P07-718                         | g.chr14:95884213C>T            | Missense                         | c.(2878-2880)GCC>ACC         | p.A060T                | 0.38                | 0.42                 | 0.57                 | 38%            |            |                |           |     |  |
|                                                                                         |                                     | PR-09-2700                      | g.chr14:95932380C>T            | Missense                         | c.(514-516)CGG>CAG           | p.R172Q                |                     |                      |                      |                |            |                |           |     |  |
|                                                                                         |                                     | PR-2916                         | g.chr14:95899740C>A            | Nonsense                         | c.(2545-2547)GAG>TAG         | p.E849*                |                     |                      |                      |                |            |                |           |     |  |
|                                                                                         |                                     | PR-3023                         | g.chr14:95906394G>A            | Missense                         | c.(1087-1089)GCC>GTG         | p.A363V                |                     |                      |                      |                |            |                |           |     |  |
|                                                                                         |                                     | PR-3023                         | g.chr14:95906394G>A            | Missense                         | c.(1930-1932)CGG>TGG         | p.R644W                |                     |                      |                      |                |            |                |           |     |  |
| <b>SCN11A</b> (uc011ays.1)                                                              | P07-144                             | P07-144                         | g.chr3:38926826A>T             | Nonsense                         | c.(3016-3018)TTA>TAA         | p.L1006*               | 0.02                | 0.03                 | 1.15                 | 24%            |            |                |           |     |  |
|                                                                                         |                                     | PR-00-1823                      | g.chr3:38938566G>A             | Missense                         | c.(2173-2175)CGT>TGT         | p.R725C                |                     |                      |                      |                |            |                |           |     |  |
|                                                                                         |                                     | PR-01-2554                      | g.chr3:38938608C>A             | Nonsense                         | c.(2791-2793)GAA>TAA         | p.E931*                |                     |                      |                      |                |            |                |           |     |  |
|                                                                                         |                                     | PR-06-1999                      | g.chr3:389388451C>T            | Missense                         | c.(2287-2289)CGC>CAC         | p.R763H                |                     |                      |                      |                |            |                |           |     |  |
|                                                                                         |                                     | PR-09-2517                      | g.chr3:389388451C>T            | Missense                         | c.(2287-2289)CGC>CAC         | p.R763H                |                     |                      |                      |                |            |                |           |     |  |
| 2. Mutations previously reported in cancer                                              | <b>IDH1</b> (uc002vcs.2)            | P06-2325                        | P06-2325                       | g.chr2:209113112C>T              | Missense                     | c.(394-396)CGT>CAT     | p.R132H             | 6.00                 | 5.94                 | 0.14           | 98%        | (62),(63)      |           |     |  |
|                                                                                         |                                     |                                 | P06-1125                       | g.chr14:105246551C>T             | Missense                     | c.(49-51)GAA>AAG       | p.E17K              | 5.51                 | 5.51                 | 0.06           | 97%        | (64)           |           |     |  |
|                                                                                         |                                     |                                 | PR-09-5702                     | g.chr11:533874T>C                | Missense                     | c.(181-183)CAG>CGG     | p.O617R             | 4.98                 | 4.94                 | 0.08           | 95%        | (65),(66)      |           |     |  |
|                                                                                         |                                     |                                 | P00-000450                     | g.chr11:108218029G>T             | Missense                     | c.(8608-8610)GAT>TAT   | p.D2870Y            | 1.33                 | 1.30                 | 0.30           | 54%        | (67-69)        |           |     |  |
|                                                                                         |                                     |                                 | PR-09-2767                     | g.chr11:108218537C>T             | Missense                     | c.(8465-8467)CCA>CTA   | p.P2829L            |                      |                      |                |            |                |           |     |  |
|                                                                                         |                                     |                                 | PR-2662                        | g.chr11:108201148-108201148(del) | Frame shift deletion         | c.(7513-7515)fs        | p.K2505fs           |                      |                      |                |            |                |           |     |  |
|                                                                                         |                                     |                                 | P05-620                        | g.chr5:112173635A>T              | Nonsense                     | c.(2344-2346)AAG>TAG   | p.K782*             | 1.11                 | 1.18                 | 0.34           | 51%        | (70),(71)      |           |     |  |
| 3. Genes with a damaging mutation that undergo damaging mutations in other cancer types | <b>APC</b> (uc010by.2)              | PR-00-160                       | P00-160                        | g.chr5:112175799-112175799(del)  | Frame shift deletion         | c.(4687-4689)fs        | p.L1563fs           |                      |                      |                |            |                |           |     |  |
|                                                                                         |                                     |                                 | PR-09-3566                     | g.chr5:67591248A>G               | Splice site mutation         | N/A                    | p.M582_splice       | 2.29                 | 2.22                 | 0.23           | 69%        | (72)           |           |     |  |
|                                                                                         |                                     |                                 | PR-2961                        | g.chr12:49438067G>A              | Nonsense                     | c.(5104-5106)CGA>TGA   | p.R1702*            | 3.26                 | 3.13                 | 0.17           | 81%        | (40),(73),(74) |           |     |  |
|                                                                                         |                                     |                                 | PR-3048                        | g.chr7:151859711C>A              | Nonsense                     | c.(10851-10853)GAG>TAG | p.E3651*            | 2.25                 | 2.22                 | 0.21           | 68%        | (40),(74)      |           |     |  |
|                                                                                         |                                     |                                 | P07-360                        | g.chrX:44941855-44941872(del)    | Frame shift deletion         | c.(3343-3354)fs        | p.S1115fs           | 2.00                 | 2.01                 | 0.18           | 64%        | (75)           |           |     |  |
|                                                                                         |                                     |                                 | PR-2916                        | g.chrX:44945155G>T               | Missense                     | c.(3634-3636)GGC>GTC   | p.G1212V            |                      |                      |                |            |                |           |     |  |
|                                                                                         |                                     |                                 | PR-3036                        | g.chrX:44945146T>A               | Missense                     | c.(3625-3627)ATA>AAA   | p.I1209K            |                      |                      |                |            |                |           |     |  |
|                                                                                         |                                     |                                 | P04-2599                       | g.chr1:27101666C>T               | Nonsense                     | c.(4948-4950)CAG>TAG   | p.Q1650*            | 4.03                 | 3.98                 | 0.09           | 89%        | (76),(77)      |           |     |  |
|                                                                                         |                                     |                                 | PR-09-3421                     | g.chr1:27098957A>T               | Missense                     | c.(3736-3738)ATG>TTG   | p.M1246L            |                      |                      |                |            |                |           |     |  |
|                                                                                         |                                     |                                 | EPHA7 (uc003poe.2)             | P04-1084                         | g.chr6:93967815A>C           | Splice site mutation   | N/A                 | p.G704_splice        | 0.92                 | 0.95           | 0.47       | 48%            | (78),(79) |     |  |
|                                                                                         |                                     |                                 | NCOR1 (uc002ppo.2)             | P05-620                          | g.chr17:16012098A>C          | Splice site mutation   | N/A                 | p.V728_splice        | 3.07                 | 3.10           | 0.13       | 79%            | (76)      |     |  |
|                                                                                         |                                     |                                 | PR-2490                        | g.chr17:15935762G>A              | Missense                     | c.(7171-7173)CGG>TTG   | p.R2391W            |                      |                      |                |            |                |           |     |  |
| PR-2682                                                                                 | g.chr11:11835577G>T                 | Nonsense                        | c.(4219-4221)GAG>TAG           | p.E1407*                         | 2.35                         | 2.31                   | 0.16                | 69%                  | (76)                 |                |            |                |           |     |  |

**Supplementary Table S5. Significantly Mutated Gene Sets**

Curated gene sets representing canonical pathways were analyzed for enrichment of mutations in their constituent genes (Supplementary Methods). Sets that are significantly mutated above a q-value of 0.05 (Benjamini-Hochberg adjustment) are listed.

| Gene Set                        | No. mutations | No. tumors with a mutation | B-H q-value | Genes in set mutated (no. tumors affected)                                                                                                                                   |
|---------------------------------|---------------|----------------------------|-------------|------------------------------------------------------------------------------------------------------------------------------------------------------------------------------|
| SA_G1_AND_S_PHASES              | 11            | 10                         | 0.00033     | CDKN1B(3), TP53(8)                                                                                                                                                           |
| RBPATWAY                        | 14            | 13                         | 0.00033     | ATM(3), CDC25A(1), MYT1(1), TP53(8), WEE1(1)                                                                                                                                 |
| P53HYPOXIAPATHWAY               | 14            | 13                         | 0.0048      | ABCB1(2), AKT1(1), ATM(3), TP53(8)                                                                                                                                           |
| TERTPATHWAY                     | 9             | 8                          | 0.0048      | SP1(1), TP53(8)                                                                                                                                                              |
| PLK3PATHWAY                     | 11            | 10                         | 0.0062      | ATM(3), TP53(8)                                                                                                                                                              |
| IGF1MTORPATHWAY                 | 14            | 13                         | 0.0072      | AKT1(1), GSK3B(1), IGF1R(1), INPPL1(1), PIK3CA(4), PIK3R1(1), PTEN(5)                                                                                                        |
| ARFPATHWAY                      | 13            | 12                         | 0.008       | PIK3CA(4), PIK3R1(1), TP53(8)                                                                                                                                                |
| G1PATHWAY                       | 16            | 14                         | 0.008       | ATM(3), CDC25A(1), CDKN1B(3), GSK3B(1), TP53(8)                                                                                                                              |
| G2PATHWAY                       | 17            | 16                         | 0.011       | ATM(3), CDC25A(1), EP300(1), MYT1(1), PRKDC(1), RPS6KA1(1), TP53(8), WEE1(1)                                                                                                 |
| CHEMICALPATHWAY                 | 16            | 14                         | 0.011       | AKT1(1), ATM(3), CASP3(1), CASP9(1), TLN1(2), TP53(8)                                                                                                                        |
| PTENPATHWAY                     | 17            | 16                         | 0.011       | AKT1(1), BCAR1(1), CDKN1B(3), ILK(1), PIK3CA(4), PIK3R1(1), PTEN(5), SHC1(1)                                                                                                 |
| RNAPATHWAY                      | 9             | 8                          | 0.011       | DNAJC3(1), TP53(8)                                                                                                                                                           |
| P53PATHWAY                      | 11            | 10                         | 0.017       | ATM(3), TP53(8)                                                                                                                                                              |
| COMPLEMENT_ACTIVATION_CLASSICAL | 10            | 10                         | 0.017       | C1QB(1), C1S(1), C3(3), C6(1), C8A(1), C9(2), MASP1(1)                                                                                                                       |
| CLASSICPATHWAY                  | 9             | 9                          | 0.018       | C1QB(1), C1S(1), C3(3), C6(1), C8A(1), C9(2)                                                                                                                                 |
| COMPPATHWAY                     | 10            | 10                         | 0.018       | C1QB(1), C1S(1), C3(3), C6(1), C8A(1), C9(2), MASP1(1)                                                                                                                       |
| HCMVPATHWAY                     | 10            | 10                         | 0.018       | AKT1(1), CREB1(1), MAP2K6(1), MAPK14(1), PIK3CA(4), PIK3R1(1), SP1(1)                                                                                                        |
| TELPATHWAY                      | 14            | 13                         | 0.025       | AKT1(1), EGFR(1), IGF1R(1), POLR2A(1), TEP1(1), TP53(8), XRCC5(1)                                                                                                            |
| ALTERNATIVEPATHWAY              | 7             | 7                          | 0.027       | C3(3), C6(1), C8A(1), C9(2)                                                                                                                                                  |
| CDC42RACPATHWAY                 | 8             | 7                          | 0.027       | ACTR2(1), PDGFRA(2), PIK3CA(4), PIK3R1(1)                                                                                                                                    |
| SA_PTEN_PATHWAY                 | 12            | 11                         | 0.04        | AKT1(1), ILK(1), PIK3CA(4), PTEN(5), SHC1(1)                                                                                                                                 |
| RACCYCDPATHWAY                  | 11            | 11                         | 0.04        | AKT1(1), CDKN1B(3), HRAS(1), PIK3CA(4), PIK3R1(1), RAF1(1)                                                                                                                   |
| CELL_CYCLE_KEGG                 | 29            | 28                         | 0.042       | ATM(3), BUB3(1), CDC20(1), CDC25A(1), CDC6(1), CDH1(1), EP300(1), ESPL1(1), GSK3B(1), HDAC2(2), HDAC3(1), HDAC5(2), MAD1L1(1), MCM4(1), PRKDC(1), SMAD4(1), TP53(8), WEE1(1) |
| IGF1RPATHWAY                    | 11            | 11                         | 0.042       | AKT1(1), HRAS(1), IGF1R(1), IRS1(1), PIK3CA(4), PIK3R1(1), RAF1(1), SHC1(1)                                                                                                  |

**Supplementary Table S6. Systematic Sequencing Studies Including SPOP**

| <b>Cancer type</b> | <b>Samples (N)</b> | <b>SPOP mutations</b> | <b>Reference</b> | <b>Approach</b>                                    |
|--------------------|--------------------|-----------------------|------------------|----------------------------------------------------|
| Prostate           | 7                  | 2: F102C, F133V       | (14)             | Paired-end whole-genome sequencing                 |
| Prostate           | 58                 | 2: F125V, F133V       | (17)             | Mismatch repair detection (MRD)                    |
| Lung               | 134                | 2: N169S, L190F       | (17)             | Mismatch repair detection (MRD)                    |
| Ovarian            | 316                | 1: E249*              | (43)             | Whole exome sequencing                             |
| Ovarian            | 8                  | 1: E47K               | (80)             | Whole exome sequencing                             |
| Ovarian            | 58                 | None                  | (17)             | Mismatch repair detection (MRD)                    |
| HNSCC              | 76                 | None                  | (39)             | Whole exome and paired-end whole-genome sequencing |
| RCC                | 101                | None                  | (81)             | PCR-based exon resequencing                        |
| RCC                | 7                  | None                  | (82)             | Whole exome sequencing                             |
| Pancreatic         | 8                  | None                  | (17)             | Mismatch repair detection (MRD)                    |
| Pancreatic         | 24                 | None                  | (83)             | Whole exome sequencing                             |
| Breast             | 183                | None                  | (17)             | Mismatch repair detection (MRD)                    |
| Breast             | 11                 | None                  | (84)             | Whole exome sequencing                             |
| Breast             | 24                 | None                  | (85)             | Paired-end whole-genome sequencing                 |
| Medulloblastoma    | 22                 | None                  | (74)             | Whole exome sequencing                             |
| GBM                | 22                 | None                  | (63)             | Whole exome sequencing                             |
| Colorectal         | 11                 | None                  | (84)             | Whole exome sequencing                             |
| AML                | 1                  | None                  | (86)             | Single-end whole-genome sequencing                 |
| AML                | 1                  | None                  | (87)             | Paired-end whole-genome sequencing                 |
| Melanoma           | 1                  | None                  | (88)             | Paired-end whole-genome sequencing                 |
| SCLC               | 1                  | None                  | (89)             | Paired-end whole-genome sequencing                 |

**Supplementary Table S7. SPOP Mutations in Multiple Cohorts**

| <b>Cohort</b> | <b>SPOP mutation prevalence</b> | <b>Technology</b>    | <b>Mutated residues</b>                               |
|---------------|---------------------------------|----------------------|-------------------------------------------------------|
| WCMC          | 13.3 % (11/83)                  | WES, RNA-seq, Sanger | Y87N, Y87C, F102C, K129E, F133V, F133S, F133L, F133C  |
| Uropath       | 10.1% (9/89)                    | WES                  | Y87N, S119N, F125L, W131G, F133S, F133L, F133C, K134N |
| UM            | 6.1% (3/49)                     | RNA-seq              | F102C, F133L, F133V                                   |
| UHZ           | 8.3% (16/193)                   | Sanger               | Y87N, F102C, F102S, W131C, F133V, F133L               |
| UW            | 14.5% (6/39)                    | Sanger               | F102C, F102D, W131G, F133V                            |



**Supplementary Table S8. Somatic Copy Number Alterations Associated with SPOP Mutation**

| Type | Cytoband | Area Coordinates (hg18)  | Peak Coordinates (hg18)  | q.values  | Association with SPOP mutation: |            |                |            |          |            |
|------|----------|--------------------------|--------------------------|-----------|---------------------------------|------------|----------------|------------|----------|------------|
|      |          |                          |                          |           | Discovery set                   |            | Validation set |            | Combined |            |
|      |          |                          |                          |           | P-value                         | Odds ratio | P-value        | Odds ratio | P-value  | Odds ratio |
| Del  | 6q15     | chr6:84993071-90693659   | chr6:89844069-89854517   | 7.60E-14  | 0                               | 49.0936    | 0.0494         | 4.6152     | 0        | 14.9182    |
| Del  | 5q14.3   | chr5:86736848-92949317   | chr5:90698354-90718446   | 4.76E-06  | 0                               | 28.9982    | 0.0023         | 10.5654    | 0        | 18.5816    |
| Del  | 6q21     | chr6:102623781-118338352 | chr6:107452805-107484929 | 2.72E-12  | 0                               | 30.1055    | 0.0003         | 14.5979    | 0        | 23.0189    |
| Del  | 5q21.1   | chr5:96540739-99903527   | chr5:98211239-98298151   | 6.24E-17  | 0                               | 26.1837    | 0              | 23.6731    | 0        | 26.5255    |
| Del  | 5q21.1   | chr5:98288994-100177733  | chr5:99892827-99956161   | 1.12E-11  | 0.0001                          | 13.0406    | 0.0006         | 11.2936    | 0        | 12.8012    |
| Del  | 6q14.1   | chr6:79992719-89377471   | chr6:82929067-83023893   | 3.50E-10  | 0.0001                          | 10.9692    | 0.0427         | 4.4101     | 0        | 7.6868     |
| Del  | 5q21.3   | chr5:100266177-130524037 | chr5:108694667-108775892 | 2.46E-06  | 0.0012                          | 7.412      | 0.0001         | 20.5115    | 0        | 10.8653    |
| Del  | 6q13     | chr6:71718724-79638241   | chr6:74188319-74228252   | 6.62E-05  | 0.0017                          | 6.8441     | 0.2702         | 2.4264     | 0.0015   | 4.4487     |
| Del  | 21q22.3  | chr21:41569692-42033506  | chr21:41754509-41805040  | 3.20E-13  | 0.0043                          | 0          | 0.1836         | 0          | 0.0004   | 0          |
| Del  | 5q11.2   | chr5:54500232-57785740   | chr5:55428291-55450265   | 3.84E-08  | 0.0044                          | 5.4502     | 0.0107         | 7.6381     | 0.0004   | 4.9509     |
| Amp  | 8q24.3   | chr8:142130394-143948850 | chr8:143649163-143686346 | 0.005918  | 0.0104                          | 4.7801     | 0.4292         | 0.3188     | 0.1905   | 1.9013     |
| Del  | 17p13.1  | chr17:7099211-7923319    | chr17:7723851-7759444    | 2.24E-07  | 0.0157                          | 0.1101     | 0.6699         | 0.409      | 0.0089   | 0.1662     |
| Del  | 2q21.1   | chr2:114430192-140707944 | chr2:131673017-131764875 | 0.0027275 | 0.0179                          | 5.1272     | 0.0191         | 6.0238     | 0.0007   | 5.6709     |
| Del  | 3p13     | chr3:70098695-73514455   | chr3:71884403-71891255   | 2.46E-06  | 0.0188                          | 0          | 0.6731         | 0.4708     | 0.0179   | 0.1198     |
| Amp  | 21q21.1  | chr21:18980067-18997817  | chr21:18980170-18994744  | 0.024377  | 0.0279                          | 7.9899     | 1              | 0          | 0.144    | 2.9523     |
| Amp  | 3q22.3   | chr3:138503860-138525897 | chr3:138503876-138514781 | 0.0046072 | 0.0284                          | 3.8842     | 1              | 1.0223     | 0.1342   | 2.3893     |
| Amp  | 7q11.23  | chr7:71946015-71962929   | chr7:71948417-71962425   | 0.076891  | 0.0333                          | 4.1148     | 0.6154         | 1.7416     | 0.0554   | 2.9006     |
| Amp  | 7q21.2   | chr7:91212265-91215184   | chr7:91212282-91215163   | 0.059607  | 0.0333                          | 4.1148     | 0.6154         | 1.7416     | 0.0554   | 2.9006     |
| Del  | 2q23.3   | chr2:151939541-152050232 | chr2:151970139-152045679 | 0.074786  | 0.0349                          | 4.8599     | 0.65           | 1.4242     | 0.0829   | 2.9745     |
| Del  | 17q21.31 | chr17:39091591-40194083  | chr17:39820952-39945190  | 1.17E-05  | 0.0366                          | 0          | 0.1836         | 0          | 0.0026   | 0          |
| Amp  | 7p15.2   | chr7:26355665-26394413   | chr7:26356137-26393733   | 0.059607  | 0.0435                          | 3.7332     | 0.5879         | 2.2144     | 0.0554   | 2.9006     |

**Supplementary Table S9. Primer Sequences**

| <b>Amplification</b> | <b>sense (5' --&gt; 3')</b> | <b>antisense (5' --&gt; 3')</b> |
|----------------------|-----------------------------|---------------------------------|
| <i>SPOP</i>          |                             |                                 |
| Exons 6 and 7        | TTCTATGGGGCCTGCATTT         | CTCCACTTGGGGCTTTTTCT            |
| <b>Sequencing</b>    |                             |                                 |
| <i>SPOP</i>          |                             |                                 |
| Exon 6               | TTTTCTATCTGTTTTGGACAGG      | CAAAGCCACAACCTTGTCAGTG          |
| Exon 7               | TTTGCGAGTAAACCCCAAAG        | CTCATCAGATCTGGGAACTGC           |
| <b>qPCR</b>          |                             |                                 |
| <i>SPOP</i>          |                             |                                 |
| GAPDH                | CTTCTGCGAGGTGAGTGTTG        | TCCCACAGTCCTCCTAACTCA           |
|                      | TGCACCACCAACTGCTTAGC        | GGCATGGACTGTGGTCATGAG           |

**Supplementary Table S10. BAC Probes Used for FISH**

| <b>Assay</b>                   | <b>BAC</b>  |
|--------------------------------|-------------|
| <b><i>ERG</i> break-apart</b>  |             |
| 5' probe                       | RP11-372O17 |
| 3' probe                       | RP11-24A11  |
| <b><i>ETV1</i> break-apart</b> |             |
| 5' probe                       | RP11-661L15 |
| 3' probe                       | RP11-79G16  |
| <b><i>ETV4</i> break-apart</b> |             |
| 5' probe                       | RP11-147C10 |
| 3' probe                       | CTD-3215I16 |
| <b><i>ETV5</i> break-apart</b> |             |
| 5' probe                       | RP11-822O23 |
| 3' probe                       | RP11-480B15 |
| <b><i>PTEN</i> deletion</b>    |             |
| PTEN probe                     | CTD-2047N14 |
| Reference probe                | RP11-431P18 |

**Supplementary Table S11. Mutation of *PIK3CA* and *PTEN* is Enriched in Locally Advanced Tumors**

(A) Tumors are grouped by stage and mutational status of *PIK3CA* or *PTEN*. Only stage pT3 tumors displayed mutations in either gene (two-sided  $p = 0.011$ , Fisher's exact test).

(B) Mutations in *PTEN* or *PIK3CA* detected by exome sequencing. The hyper-mutated tumor, PR-00-1165, was included in this analysis and contained two canonical mutations in *PTEN*. Amino acids are numbered based on RefSeq protein ID NP\_000305 for *PTEN* and NP\_006209 for *PIK3CA*. All substitutions have been documented previously in prostate cancer or other cancer types in the Cosmic database (<http://www.sanger.ac.uk/genetics/CGP/cosmic/>). \*, nonsense mutation.

**A**

| <b>Genotype:</b>       | <b>Stage pT2</b> | <b>Stage pT3</b> | <b>Total</b> |
|------------------------|------------------|------------------|--------------|
| PIK3CA/PTEN mutant:    | 0                | 9                | 9            |
| PIK3CA/PTEN wild-type: | 44               | 59               | 103          |
| Total:                 | 44               | 68               | 112          |

**B**

| <b>PTEN mutations:</b> | <b>Reported in Cosmic?</b> |
|------------------------|----------------------------|
| K128N                  | Yes                        |
| R130Q                  | Yes                        |
| Y336*                  | Yes                        |
| G129R                  | Yes                        |
| R173H, R233*           | Yes, Yes                   |

  

| <b>PIK3CA mutations:</b> | <b>Reported in Cosmic?</b> |
|--------------------------|----------------------------|
| p.H1047R                 | Yes                        |
| p.G118D                  | Yes                        |
| p.Q546P                  | Yes                        |
| p.Y1021H                 | Yes                        |
